# Supplementary material for: Whole Genome Sequencing of the Mutamouse Model Reveals Strain- and Colony-Level Variation, and Genomic Features of the Transgene Integration Site
Source: PubMed Central journal article supplement (PMC6760142; doi:10.1038/s41598-019-50302-0), 2019-09-24
Supplement: 41598_2019_50302_MOESM1_ESM.pdf [file 41598_2019_50302_MOESM1_ESM.pdf]

**WHOLE GENOME SEQUENCING OF THE MUTAMOUSE MODEL REVEALS  
STRAIN- AND COLONY-LEVEL VARIATION, AND GENOMIC FEATURES OF THE  
TRANSGENE INTEGRATION SITE**

Matthew J. Meier<sup>1,2</sup>, Marc A. Beal<sup>1</sup>, Andrew Schoenrock<sup>1</sup>, Carole L. Yauk<sup>1</sup>, and Francesco  
Marchetti<sup>1</sup>.

<sup>1</sup>Environmental Health Science and Research Bureau, Health Canada, Ottawa, ON, Canada.

<sup>2</sup>Present address: Ecotoxicology and Wildlife Health Division, Environment and Climate Change  
Canada, Ottawa, ON, Canada.

MJM: matthew.meier@canada.ca

MAB: marc.beal@canada.ca

AS: Andrew.schoenrock@canada.ca

CLY: carole.yauk@canada.ca

Corresponding author:

Francesco Marchetti: francesco.marchetti@canada.ca

Environmental Health Science and Research Bureau, Tunney's Pasture, 0803A, Health Canada

Ottawa, ON, Canada, K1A 0K9

Phone: (613) 957-3137

**Running title:** Whole genome sequence of the MutaMouse

**Supplemental Table S1.** Variant statistics for MutaMouse animals from the Health Canada colony sequenced in this study.

|                                           | MutaMouse 1 | MutaMouse 2 | MutaMouse 3 | MutaMouse 4 | MutaMouse 5 | MutaMouse Covance Female | MutaMouse Covance Male | Source(s) and Tools Used                          |
|-------------------------------------------|-------------|-------------|-------------|-------------|-------------|--------------------------|------------------------|---------------------------------------------------|
| total_variants                            | 4,994,589   | 4,961,695   | 5,144,580   | 4,949,501   | 5,161,277   | 3,909,462                | 3,930,237              | GATK HaplotypeCaller, bcftools stats              |
| total SNVs                                | 3,894,348   | 3,860,502   | 4,014,320   | 3,857,544   | 4,013,971   | 3,146,750                | 3,158,530              | GATK HaplotypeCaller, bcftools stats              |
| total deletions                           | 533,166     | 531,825     | 546,527     | 527,912     | 557,462     | 368,744                  | 373,237                | GATK HaplotypeCaller, bcftools stats              |
| total insertions                          | 473,937     | 473,541     | 488,193     | 470,135     | 493,778     | 326,635                  | 329,881                | GATK HaplotypeCaller, bcftools stats              |
| % SNVs                                    | 78%         | 78%         | 78%         | 78%         | 78%         | 80%                      | 80%                    | GATK HaplotypeCaller, bcftools stats              |
| other                                     | 93,138      | 95,827      | 95,540      | 93,910      | 96,066      | 67,333                   | 68,589                 | GATK HaplotypeCaller, bcftools stats              |
| % novel                                   | 19%         | 20%         | 19%         | 19%         | 19%         | 16%                      | 16%                    | SnEff                                             |
| % existing                                | 81%         | 80%         | 81%         | 81%         | 81%         | 84%                      | 84%                    | SnEff                                             |
| private variants                          | 81,615      | 72,623      | 119,338     | 54,249      | 148,591     | 24,259                   | 27,277                 | SnEff                                             |
| number novel                              | 937,004     | 989,828     | 984,316     | 945,768     | 957,461     | 630,584                  | 646,769                | SnEff                                             |
| all_tox_functions                         | 234,733     | 223,065     | 251,734     | 234,194     | 256,570     | 186,621                  | 187,862                | Ensembl Variant Effect Predictor, COSMIC, biomaRt |
| all_functions deleterious                 | 150         | 152         | 181         | 171         | 153         | 134                      | 134                    | Ensembl Variant Effect Predictor, COSMIC, biomaRt |
| all_functions non_synonymous_coding       | 1,007       | 961         | 1,138       | 998         | 1,023       | 809                      | 815                    | Ensembl Variant Effect Predictor, COSMIC, biomaRt |
| all_functions novel                       | 37,305      | 36,947      | 40,033      | 37,610      | 40,205      | 24,246                   | 24,991                 | Ensembl Variant Effect Predictor, COSMIC, biomaRt |
| all_functions novel non_synonymous_coding | 76          | 83          | 98          | 95          | 83          | 66                       | 75                     | Ensembl Variant Effect Predictor, COSMIC, biomaRt |
| cancer                                    | 93,708      | 80,922      | 98,330      | 89,172      | 110,565     | 71,057                   | 71,513                 | Ensembl Variant Effect Predictor, COSMIC          |
| cancer deleterious                        | 52          | 54          | 67          | 65          | 56          | 42                       | 43                     | Ensembl Variant Effect Predictor, COSMIC          |
| cancer non_synonymous_coding              | 301         | 313         | 354         | 324         | 327         | 237                      | 242                    | Ensembl Variant Effect Predictor, COSMIC          |
| cancer novel                              | 15,099      | 14,455      | 15,681      | 14,906      | 16,748      | 9,512                    | 9,820                  | Ensembl Variant Effect Predictor, COSMIC          |
| cancer novel non_synonymous_coding        | 34          | 38          | 45          | 44          | 39          | 37                       | 44                     | Ensembl Variant Effect Predictor, COSMIC          |

|                                                   |         |         |         |         |         |         |         |                                           |
|---------------------------------------------------|---------|---------|---------|---------|---------|---------|---------|-------------------------------------------|
| cancer deleterious novel                          | 8       | 10      | 20      | 20      | 11      | 20      | 22      | Ensembl Variant Effect Predictor, COSMIC  |
| cell_cycle                                        | 133,838 | 135,318 | 147,108 | 136,668 | 138,297 | 111,611 | 112,389 | Ensembl Variant Effect Predictor, biomaRt |
| cell_cycle deleterious                            | 98      | 96      | 117     | 102     | 98      | 91      | 90      | Ensembl Variant Effect Predictor, biomaRt |
| cell_cycle non_synonymous_coding                  | 659     | 598     | 745     | 621     | 645     | 541     | 545     | Ensembl Variant Effect Predictor, biomaRt |
| cell_cycle novel                                  | 21,452  | 21,943  | 23,716  | 21,821  | 22,785  | 14,304  | 14,734  | Ensembl Variant Effect Predictor, biomaRt |
| cell_cycle novel non_synonymous_coding            | 47      | 47      | 58      | 51      | 49      | 31      | 36      | Ensembl Variant Effect Predictor, biomaRt |
| cell cycle novel sift deleterious                 | 23      | 24      | 29      | 26      | 23      | 17      | 17      | Ensembl Variant Effect Predictor, biomaRt |
| dna_repair                                        | 35,592  | 34,416  | 39,493  | 37,618  | 39,869  | 28,344  | 28,474  | Ensembl Variant Effect Predictor, biomaRt |
| dna_repair deleterious                            | 27      | 27      | 27      | 30      | 28      | 29      | 29      | Ensembl Variant Effect Predictor, biomaRt |
| dna_repair non_synonymous_coding                  | 244     | 222     | 246     | 238     | 258     | 198     | 199     | Ensembl Variant Effect Predictor, biomaRt |
| dna_repair novel                                  | 5,567   | 5,475   | 6,055   | 5,802   | 6,156   | 3,663   | 3,748   | Ensembl Variant Effect Predictor, biomaRt |
| dna_repair novel non_synonymous_coding            | 3       | 9       | 3       | 7       | 5       | 6       | 7       | Ensembl Variant Effect Predictor, biomaRt |
| dna repair novel sift deleterious                 | -       | 4       | 1       | 3       | 1       | 3       | 3       | Ensembl Variant Effect Predictor, biomaRt |
| xenobiotic_metabolism                             | 3,483   | 3,295   | 3,469   | 3,326   | 3,278   | 2,932   | 2,934   | Ensembl Variant Effect Predictor, biomaRt |
| xenobiotic_metabolism deleterious                 | 2       | 2       | 2       | 2       | 2       | 2       | 2       | Ensembl Variant Effect Predictor, biomaRt |
| xenobiotic_metabolism non_synonymous_coding       | 13      | 11      | 11      | 11      | 11      | 10      | 10      | Ensembl Variant Effect Predictor, biomaRt |
| xenobiotic_metabolism novel                       | 630     | 586     | 643     | 583     | 592     | 362     | 354     | Ensembl Variant Effect Predictor, biomaRt |
| xenobiotic_metabolism novel non_synonymous_coding | 1       | 1       | 1       | 1       | 1       | 1       | 1       | Ensembl Variant Effect Predictor, biomaRt |
| xenobiotic novel sift deleterious                 | 1       | 1       | 1       | 1       | 1       | 1       | 1       | Ensembl Variant Effect Predictor, biomaRt |
| CNVnator Deletions                                | 2,567   | 2,324   | 2,691   | 2,415   | 2,828   | 1,906   | 2,034   | CNVnator                                  |
| CNVnator Duplications                             | 1,652   | 2,887   | 1,528   | 1,614   | 1,426   | 2,294   | 2,348   | CNVnator                                  |
| Manta Deletions                                   | 5,097   | 4,831   | 5,232   | 4,931   | 5,386   | 311     | 81      | manta                                     |

|                           |        |        |        |        |        |     |     |       |
|---------------------------|--------|--------|--------|--------|--------|-----|-----|-------|
| Manta Short Deletions     | 11,941 | 10,533 | 12,435 | 11,771 | 12,988 | 705 | 100 | manta |
| Manta Translocations      | 7,096  | 5,034  | 7,479  | 6,715  | 8,816  | 130 | 30  | manta |
| Manta Inversions          | 1,052  | 884    | 1,092  | 1,041  | 1,208  | 28  | 13  | manta |
| Manta Insertions          | 2,537  | 2,277  | 2,649  | 2,542  | 2,798  | 60  | 15  | manta |
| Manta Short Insertions    | 4,889  | 3,786  | 5,024  | 4,703  | 5,261  | 140 | 11  | manta |
| Manta Tandem Duplications | 1,208  | 1,007  | 1,222  | 1,142  | 1,247  | 18  | 5   | manta |

**Supplementary Table 2. Lists of mouse genes within pathways related to toxicology.**

| MGI Gene Symbol | cancer | cell cycle | DNA repair | xenobiotic metabolism |
|-----------------|--------|------------|------------|-----------------------|
| 1500015O10Rik   |        | cell cycle |            |                       |
| 1700123I01Rik   |        | cell cycle |            |                       |
| 1810011O10Rik   |        | cell cycle |            |                       |
| 2610002M06Rik   |        | cell cycle |            |                       |
| 2810417H13Rik   |        | cell cycle | DNA repair |                       |
| 4930544G11Rik   | cancer |            |            |                       |
| 4933406J08Rik   |        | cell cycle |            |                       |
| 4933427D14Rik   |        | cell cycle |            |                       |
| Aatf            |        | cell cycle |            |                       |
| Abcb1a          |        | cell cycle |            |                       |
| Abi1            | cancer |            |            |                       |
| Abl1            | cancer | cell cycle | DNA repair |                       |
| Abl2            | cancer |            |            |                       |
| Ackr3           | cancer |            |            |                       |
| Acsl1           |        |            |            | xenobiotic metabolism |
| Acsl3           | cancer |            |            |                       |
| Acsl6           | cancer |            |            |                       |
| Actl6a          |        |            | DNA repair |                       |
| Actr2           |        | cell cycle |            |                       |
| Actr3           |        | cell cycle |            |                       |
| Actr5           |        |            | DNA repair |                       |
| Actr8           |        | cell cycle | DNA repair |                       |
| Acvr1           | cancer | cell cycle |            |                       |
| Acvr1b          |        | cell cycle |            |                       |
| Adam17          |        | cell cycle |            |                       |
| Adarb1          |        | cell cycle |            |                       |
| Adcyap1         |        | cell cycle |            |                       |
| Afap1l2         |        | cell cycle |            |                       |
| Aff1            | cancer |            |            |                       |
| Aff3            | cancer |            |            |                       |
| Aff4            | cancer |            |            |                       |
| Ago4            |        | cell cycle |            |                       |
| Ahctf1          |        | cell cycle |            |                       |
| Ahr             |        | cell cycle |            | xenobiotic metabolism |
| Ahrr            |        |            |            | xenobiotic metabolism |
| Aif1            |        | cell cycle |            |                       |
| Aip             |        |            |            | xenobiotic metabolism |
| Ajuba           |        | cell cycle |            |                       |
| Ak1             |        | cell cycle |            |                       |
| Akap8           |        | cell cycle |            |                       |
| Akap8l          |        | cell cycle |            |                       |
| Akap9           | cancer |            |            |                       |
| Akr1c12         |        |            |            | xenobiotic metabolism |
| Akr1c13         |        |            |            | xenobiotic metabolism |
| Akt1            | cancer | cell cycle |            |                       |
| Akt2            | cancer |            |            |                       |

|          |        |            |            |
|----------|--------|------------|------------|
| Aldh2    | cancer |            |            |
| Alk      | cancer |            |            |
| Alkbh1   |        |            | DNA repair |
| Alkbh2   |        |            | DNA repair |
| Alkbh3   |        |            | DNA repair |
| Alkbh4   |        | cell cycle |            |
| Alox8    |        | cell cycle |            |
| Amer1    | cancer |            |            |
| Anapc1   |        | cell cycle |            |
| Anapc10  |        | cell cycle |            |
| Anapc11  |        | cell cycle |            |
| Anapc13  |        | cell cycle |            |
| Anapc15  |        | cell cycle |            |
| Anapc16  |        | cell cycle |            |
| Anapc2   |        | cell cycle |            |
| Anapc4   |        | cell cycle |            |
| Anapc5   |        | cell cycle |            |
| Anapc7   |        | cell cycle |            |
| Angel2   |        | cell cycle |            |
| Ank3     |        | cell cycle |            |
| Ankle2   |        | cell cycle |            |
| Ankrd17  |        | cell cycle |            |
| Ankrd53  |        | cell cycle |            |
| Anln     |        | cell cycle |            |
| Anp32b   |        | cell cycle |            |
| Anxa1    |        | cell cycle |            |
| Anxa11   |        | cell cycle |            |
| Ap5s1    |        |            | DNA repair |
| Ap5z1    |        |            | DNA repair |
| Apbb1    |        | cell cycle | DNA repair |
| Apbb2    |        | cell cycle |            |
| Apc      | cancer | cell cycle |            |
| Apex1    |        | cell cycle | DNA repair |
| Apex2    |        | cell cycle | DNA repair |
| Apitd1   |        | cell cycle | DNA repair |
| Ap1f     |        |            | DNA repair |
| App      |        | cell cycle |            |
| Appl1    |        | cell cycle |            |
| Appl2    |        | cell cycle |            |
| Aptx     |        |            | DNA repair |
| Ar       | cancer |            |            |
| Arf6     |        | cell cycle |            |
| Arhgap26 | cancer |            |            |
| Arhgef10 |        | cell cycle |            |
| Arhgef12 | cancer |            |            |
| Arhgef2  |        | cell cycle |            |
| Arid1a   | cancer |            |            |
| Arid1b   | cancer |            |            |

|          |        |            |                       |
|----------|--------|------------|-----------------------|
| Arid2    | cancer |            |                       |
| Arl2     |        | cell cycle |                       |
| Arl3     |        | cell cycle |                       |
| Arl8a    |        | cell cycle |                       |
| Arl8b    |        | cell cycle |                       |
| Arnt     | cancer |            |                       |
| Arntl    |        | cell cycle |                       |
| Arpp19   |        | cell cycle |                       |
| As3mt    |        |            | xenobiotic metabolism |
| Ascc3    |        |            | DNA repair            |
| Ascl1    |        | cell cycle |                       |
| Asf1a    |        |            | DNA repair            |
| Asns     |        | cell cycle |                       |
| Aspm     |        | cell cycle |                       |
| Aspscr1  | cancer |            |                       |
| Asun     |        | cell cycle |                       |
| Asxl1    | cancer |            |                       |
| Asz1     |        | cell cycle |                       |
| Atad5    |        | cell cycle |                       |
| Atf1     | cancer |            |                       |
| Atf2     |        | cell cycle |                       |
| Atf5     |        | cell cycle |                       |
| Atic     | cancer |            |                       |
| Atm      | cancer | cell cycle | DNA repair            |
| Atp1a1   | cancer |            |                       |
| Atp2b3   | cancer |            |                       |
| Atp2b4   |        | cell cycle |                       |
| Atr      | cancer | cell cycle | DNA repair            |
| Atraid   |        | cell cycle |                       |
| Atrx     | cancer | cell cycle | DNA repair            |
| Aunip    |        | cell cycle |                       |
| Aurka    |        | cell cycle |                       |
| Aurkb    |        | cell cycle |                       |
| Aurkc    |        | cell cycle |                       |
| Avpi1    |        | cell cycle |                       |
| Axin1    | cancer |            |                       |
| Axin2    | cancer | cell cycle | DNA repair            |
| AY074887 |        | cell cycle |                       |
| Azi2     |        | cell cycle |                       |
| B2m      | cancer |            |                       |
| Babam1   |        | cell cycle | DNA repair            |
| Bach1    |        | cell cycle | DNA repair            |
| Bad      |        | cell cycle |                       |
| Bag6     |        | cell cycle |                       |
| Bak1     |        | cell cycle |                       |
| Banp     |        | cell cycle |                       |
| Bap1     | cancer | cell cycle |                       |
| Bard1    |        |            | DNA repair            |

|          |        |            |            |
|----------|--------|------------|------------|
| Bax      |        | cell cycle |            |
| Baz1b    |        |            | DNA repair |
| Bbs4     |        | cell cycle |            |
| BC004004 |        | cell cycle |            |
| BC029214 |        |            | DNA repair |
| Bcat1    |        | cell cycle |            |
| Bccip    |        | cell cycle | DNA repair |
| Bcl10    | cancer |            |            |
| Bcl11a   | cancer |            |            |
| Bcl11b   | cancer |            |            |
| Bcl2     | cancer | cell cycle |            |
| Bcl2l1   |        | cell cycle |            |
| Bcl2l11  |        | cell cycle |            |
| Bcl3     | cancer |            |            |
| Bcl6     | cancer |            |            |
| Bcl7a    | cancer |            |            |
| Bcl9     | cancer |            |            |
| Bcor     | cancer |            |            |
| Bcorl1   | cancer |            |            |
| Bcr      | cancer | cell cycle |            |
| Becn1    |        | cell cycle |            |
| Bex2     |        | cell cycle |            |
| Bid      |        | cell cycle |            |
| Bin1     |        | cell cycle |            |
| Bin3     |        | cell cycle |            |
| Birc2    |        | cell cycle |            |
| Birc3    | cancer |            |            |
| Birc5    |        | cell cycle |            |
| Birc6    |        | cell cycle |            |
| Birc7    |        | cell cycle |            |
| Bivm     |        |            | DNA repair |
| Blcap    |        | cell cycle |            |
| Blm      | cancer | cell cycle | DNA repair |
| Bmp2     |        | cell cycle |            |
| Bmp4     |        | cell cycle |            |
| Bmp7     |        | cell cycle |            |
| Bmpr1a   | cancer |            |            |
| Bod1     |        | cell cycle |            |
| Bod1l    |        |            | DNA repair |
| Boll     |        | cell cycle |            |
| Bop1     |        | cell cycle |            |
| Bora     |        | cell cycle |            |
| Braf     | cancer |            |            |
| Brca1    | cancer | cell cycle | DNA repair |
| Brca2    | cancer | cell cycle | DNA repair |
| Brcc3    |        | cell cycle | DNA repair |
| Brd3     | cancer |            |            |
| Brd4     | cancer | cell cycle |            |



|          |        |            |            |
|----------|--------|------------|------------|
| Brd7     |        | cell cycle |            |
| Brdt     |        | cell cycle |            |
| Bre      |        | cell cycle | DNA repair |
| Brinp1   |        | cell cycle |            |
| Brinp2   |        | cell cycle |            |
| Brinp3   |        | cell cycle |            |
| Brip1    | cancer | cell cycle | DNA repair |
| Brsk1    |        | cell cycle |            |
| Brsk2    |        | cell cycle |            |
| Btc      |        | cell cycle |            |
| Btg1     | cancer |            |            |
| Btg3     |        | cell cycle |            |
| Btg4     |        | cell cycle |            |
| Btn2a2   |        | cell cycle |            |
| Btrc     |        | cell cycle |            |
| Bub1     |        | cell cycle |            |
| Bub1b    | cancer | cell cycle |            |
| Bub3     |        | cell cycle |            |
| C2cd3    |        | cell cycle |            |
| Cables1  |        | cell cycle |            |
| Cables2  |        | cell cycle |            |
| Cacna1d  | cancer |            |            |
| Cacul1   |        | cell cycle |            |
| Calm1    |        | cell cycle |            |
| Calm2    |        | cell cycle |            |
| Calm3    |        | cell cycle |            |
| Calr     | cancer | cell cycle |            |
| Camk1    |        | cell cycle |            |
| Camk2a   |        | cell cycle |            |
| Camk2b   |        | cell cycle |            |
| Camk2d   |        | cell cycle |            |
| Camk2g   |        | cell cycle |            |
| Camta1   | cancer |            |            |
| Cant1    | cancer |            |            |
| Capn3    |        | cell cycle |            |
| Card11   | cancer |            |            |
| Cars     | cancer |            |            |
| Casc5    | cancer | cell cycle |            |
| Casp2    |        | cell cycle |            |
| Casp3    |        | cell cycle |            |
| Casp8    | cancer |            |            |
| Casp8ap2 |        | cell cycle |            |
| Cast     |        | cell cycle |            |
| Cbfa2t3  | cancer |            |            |
| Cbfb     | cancer |            |            |
| Cbl      | cancer |            |            |
| Cblb     | cancer |            |            |
| Cblc     | cancer |            |            |

|          |        |            |            |
|----------|--------|------------|------------|
| Cbx8     |        |            | DNA repair |
| Ccar1    |        | cell cycle |            |
| Ccar2    |        | cell cycle |            |
| Ccdc124  |        | cell cycle |            |
| Ccdc155  |        | cell cycle | DNA repair |
| Ccdc6    | cancer |            |            |
| Ccdc67   |        | cell cycle |            |
| Ccdc79   |        | cell cycle |            |
| Ccdc8    |        | cell cycle |            |
| Ccna1    |        | cell cycle |            |
| Ccna2    |        | cell cycle |            |
| Ccnb1    |        | cell cycle |            |
| Ccnb1ip1 | cancer | cell cycle |            |
| Ccnb2    |        | cell cycle |            |
| Ccnb3    |        | cell cycle |            |
| Ccnc     |        | cell cycle |            |
| Ccnd1    | cancer | cell cycle |            |
| Ccnd2    | cancer | cell cycle |            |
| Ccnd3    | cancer | cell cycle |            |
| Ccndbp1  |        | cell cycle |            |
| Ccne1    | cancer | cell cycle |            |
| Ccne2    |        | cell cycle |            |
| Ccnf     |        | cell cycle |            |
| Ccng1    |        | cell cycle |            |
| Ccng2    |        | cell cycle |            |
| Ccnh     |        | cell cycle |            |
| Ccni     |        | cell cycle |            |
| Ccnk     |        | cell cycle |            |
| Ccnl1    |        | cell cycle |            |
| Ccnl2    |        | cell cycle |            |
| Ccno     |        | cell cycle | DNA repair |
| Ccnt1    |        | cell cycle |            |
| Ccnt2    |        | cell cycle |            |
| Ccny     |        | cell cycle |            |
| Ccp110   |        | cell cycle |            |
| Ccpg1    |        | cell cycle |            |
| Ccpg1os  | cancer |            |            |
| Ccsap    |        | cell cycle |            |
| Cd274    | cancer |            |            |
| Cd28     |        | cell cycle |            |
| Cd2ap    |        | cell cycle |            |
| Cd74     | cancer |            |            |
| Cd79a    | cancer |            |            |
| Cd79b    | cancer |            |            |
| Cdc123   |        | cell cycle |            |
| Cdc14a   |        | cell cycle |            |
| Cdc14b   |        | cell cycle | DNA repair |
| Cdc16    |        | cell cycle |            |

|          |        |            |            |
|----------|--------|------------|------------|
| Cdc20    |        | cell cycle |            |
| Cdc23    |        | cell cycle |            |
| Cdc25a   |        | cell cycle |            |
| Cdc25b   |        | cell cycle |            |
| Cdc25c   |        | cell cycle |            |
| Cdc26    |        | cell cycle |            |
| Cdc27    |        | cell cycle |            |
| Cdc34    |        | cell cycle |            |
| Cdc42    |        | cell cycle |            |
| Cdc45    |        | cell cycle | DNA repair |
| Cdc51    |        | cell cycle | DNA repair |
| Cdc6     |        | cell cycle |            |
| Cdc7     |        | cell cycle | DNA repair |
| Cdc73    | cancer | cell cycle |            |
| Cdca2    |        | cell cycle |            |
| Cdca3    |        | cell cycle |            |
| Cdca5    |        | cell cycle | DNA repair |
| Cdca8    |        | cell cycle |            |
| Cdh1     | cancer |            |            |
| Cdh11    | cancer |            |            |
| Cdk1     |        | cell cycle |            |
| Cdk10    |        | cell cycle |            |
| Cdk11b   |        | cell cycle |            |
| Cdk12    | cancer |            |            |
| Cdk14    |        | cell cycle |            |
| Cdk2     |        | cell cycle | DNA repair |
| Cdk20    |        | cell cycle |            |
| Cdk4     | cancer | cell cycle |            |
| Cdk5     |        | cell cycle |            |
| Cdk5r1   |        | cell cycle |            |
| Cdk5rap1 |        | cell cycle |            |
| Cdk5rap2 |        | cell cycle |            |
| Cdk5rap3 |        | cell cycle |            |
| Cdk6     | cancer | cell cycle |            |
| Cdk7     |        | cell cycle | DNA repair |
| Cdk9     |        | cell cycle | DNA repair |
| Cdkn1a   |        | cell cycle |            |
| Cdkn1b   | cancer | cell cycle |            |
| Cdkn1c   |        | cell cycle |            |
| Cdkn2a   |        | cell cycle |            |
| Cdkn2b   |        | cell cycle |            |
| Cdkn2c   | cancer | cell cycle |            |
| Cdkn2d   |        | cell cycle | DNA repair |
| Cdkn3    |        | cell cycle |            |
| Cdt1     |        | cell cycle |            |
| Cdx2     | cancer |            |            |
| Cebpa    | cancer | cell cycle |            |
| Cebpg    |        |            | DNA repair |

|         |        |            |            |
|---------|--------|------------|------------|
| Cenpa   |        | cell cycle |            |
| Cenpc1  |        | cell cycle |            |
| Cenpe   |        | cell cycle |            |
| Cenpf   |        | cell cycle |            |
| Cenph   |        | cell cycle |            |
| Cenpj   |        | cell cycle |            |
| Cenpn   |        | cell cycle |            |
| Cenpt   |        | cell cycle |            |
| Cenpv   |        | cell cycle |            |
| Cenpw   |        | cell cycle |            |
| Cep120  |        | cell cycle |            |
| Cep126  |        | cell cycle |            |
| Cep131  |        | cell cycle |            |
| Cep135  |        | cell cycle |            |
| Cep152  |        | cell cycle |            |
| Cep164  |        | cell cycle | DNA repair |
| Cep192  |        | cell cycle |            |
| Cep250  |        | cell cycle |            |
| Cep55   |        | cell cycle |            |
| Cep57   |        | cell cycle |            |
| Cep5711 |        | cell cycle |            |
| Cep63   |        | cell cycle |            |
| Cep72   |        | cell cycle |            |
| Cep76   |        | cell cycle |            |
| Cep85   |        | cell cycle |            |
| Cep89   | cancer |            |            |
| Cep97   |        | cell cycle |            |
| Cetn1   |        | cell cycle |            |
| Cetn2   |        | cell cycle | DNA repair |
| Cetn3   |        | cell cycle |            |
| Cfl1    |        | cell cycle |            |
| Cgref1  |        | cell cycle |            |
| Cgrrf1  |        | cell cycle |            |
| Chaf1a  |        | cell cycle | DNA repair |
| Chaf1b  |        | cell cycle | DNA repair |
| Champ1  |        | cell cycle |            |
| Chchd4  |        |            | DNA repair |
| Chchd7  | cancer |            |            |
| Chd1l   |        |            | DNA repair |
| Chd3    |        | cell cycle |            |
| Chd4    | cancer | cell cycle |            |
| Chek1   |        | cell cycle | DNA repair |
| Chek2   | cancer | cell cycle | DNA repair |
| Chfr    |        | cell cycle |            |
| Chic2   | cancer |            |            |
| Chmp1a  |        | cell cycle |            |
| Chmp1b  |        | cell cycle |            |
| Chmp2a  |        | cell cycle |            |

|         |        |            |            |
|---------|--------|------------|------------|
| Chmp2b  |        | cell cycle |            |
| Chmp3   |        | cell cycle |            |
| Chmp4b  |        | cell cycle |            |
| Chmp4c  |        | cell cycle |            |
| Chmp5   |        | cell cycle |            |
| Chmp6   |        | cell cycle |            |
| Chmp7   |        | cell cycle |            |
| Chordc1 |        | cell cycle |            |
| Chrna4  |        |            | DNA repair |
| Chtf18  |        | cell cycle |            |
| Chtf8   |        | cell cycle |            |
| Cib1    |        | cell cycle |            |
| Cic     | cancer |            |            |
| Ciita   | cancer |            |            |
| Cinp    |        | cell cycle | DNA repair |
| Cirbp   |        | cell cycle |            |
| Cit     |        | cell cycle |            |
| Cited2  |        | cell cycle |            |
| Ckap2   |        | cell cycle |            |
| Ckap5   |        | cell cycle |            |
| Cks1b   |        | cell cycle |            |
| Cks1brt |        | cell cycle |            |
| Cks2    |        | cell cycle |            |
| Clasp1  |        | cell cycle |            |
| Clasp2  |        | cell cycle |            |
| Clgn    |        | cell cycle |            |
| Clip1   | cancer |            |            |
| Clock   |        | cell cycle |            |
| Clp1    | cancer |            |            |
| Clspn   |        | cell cycle | DNA repair |
| Cltc    | cancer | cell cycle |            |
| Cnbp    | cancer |            |            |
| Cnot3   | cancer |            |            |
| Cnppd1  |        | cell cycle |            |
| Cntd1   |        | cell cycle |            |
| Cntrl   | cancer | cell cycle |            |
| Cntrob  |        | cell cycle |            |
| Col1a1  | cancer |            |            |
| Col2a1  | cancer |            |            |
| Cops5   |        | cell cycle |            |
| Cox6c   | cancer |            |            |
| Cpeb1   |        | cell cycle |            |
| Cradd   |        | cell cycle |            |
| Creb1   | cancer |            |            |
| Creb3l1 | cancer |            |            |
| Creb3l2 | cancer |            |            |
| Crebbp  | cancer | cell cycle |            |
| Crif2   | cancer |            |            |

|               |        |            |                       |
|---------------|--------|------------|-----------------------|
| Crif3         |        | cell cycle |                       |
| Crocc         |        | cell cycle |                       |
| Crtc1         | cancer |            |                       |
| Crtc3         | cancer |            |                       |
| Cry1          |        | cell cycle |                       |
| Cryz          |        |            | xenobiotic metabolism |
| Csf3r         | cancer |            |                       |
| Csnk1a1       |        | cell cycle |                       |
| Csnk1d        |        | cell cycle |                       |
| Csnk2a1       |        | cell cycle |                       |
| Csnk2a2       |        | cell cycle |                       |
| Cspp1         |        | cell cycle |                       |
| Csrp2bp       |        | cell cycle |                       |
| Ctbp1         |        | cell cycle |                       |
| Ctc1          |        | cell cycle |                       |
| Ctcf          | cancer |            |                       |
| Ctdp1         |        | cell cycle |                       |
| Ctdsp1        |        | cell cycle |                       |
| Ctdsp2        |        | cell cycle |                       |
| Ctdspl        |        | cell cycle |                       |
| Ctgf          |        | cell cycle |                       |
| Ctnnb1        | cancer | cell cycle |                       |
| Cts7          |        | cell cycle |                       |
| Cul3          |        | cell cycle |                       |
| Cul4a         |        | cell cycle | DNA repair            |
| Cul4b         |        | cell cycle | DNA repair            |
| Cul7          |        | cell cycle |                       |
| Cul9          |        | cell cycle |                       |
| Cux1          | cancer |            |                       |
| Cuzd1         |        | cell cycle |                       |
| Cxcr4         | cancer |            |                       |
| Cxcr5         |        | cell cycle |                       |
| Cyld          | cancer | cell cycle |                       |
| Cyp1a1        |        | cell cycle | xenobiotic metabolism |
| Cyp1b1        |        |            | xenobiotic metabolism |
| Cyp26a1       |        |            | xenobiotic metabolism |
| Cyp26b1       |        | cell cycle | xenobiotic metabolism |
| Cyp27b1       |        | cell cycle |                       |
| Cyp2b10       |        |            | xenobiotic metabolism |
| Cyp2e1        |        |            | xenobiotic metabolism |
| Cyp2f2        |        |            | xenobiotic metabolism |
| Cyp2w1        |        |            | xenobiotic metabolism |
| D1Pas1        | cancer |            |                       |
| D2Wsu81e      |        | cell cycle |                       |
| D630045J12Rik | cancer |            |                       |
| D7Ertd443e    |        | cell cycle |                       |
| Dab2ip        |        | cell cycle |                       |
| Dach1         |        | cell cycle |                       |

|         |        |            |            |
|---------|--------|------------|------------|
| Dact1   |        | cell cycle |            |
| Dapk3   |        | cell cycle |            |
| Daxx    | cancer | cell cycle |            |
| Dazl    |        | cell cycle |            |
| Dbf4    |        | cell cycle |            |
| Dclre1a |        | cell cycle | DNA repair |
| Dclre1b |        | cell cycle | DNA repair |
| Dclre1c |        |            | DNA repair |
| Dctn1   | cancer |            |            |
| Dctn2   |        | cell cycle |            |
| Dctn3   |        | cell cycle |            |
| Dctn6   |        | cell cycle |            |
| Ddb1    |        | cell cycle | DNA repair |
| Ddb2    | cancer |            | DNA repair |
| Ddias   |        | cell cycle |            |
| Ddit3   | cancer | cell cycle |            |
| Ddr2    | cancer |            |            |
| Ddx1    |        |            | DNA repair |
| Ddx10   | cancer |            |            |
| Ddx11   |        | cell cycle |            |
| Ddx39b  |        | cell cycle |            |
| Ddx3x   | cancer | cell cycle |            |
| Ddx4    |        | cell cycle |            |
| Ddx5    | cancer |            |            |
| Ddx6    | cancer |            |            |
| Dek     | cancer |            | DNA repair |
| Dicer1  | cancer | cell cycle |            |
| Dis3l2  |        | cell cycle |            |
| Dixdc1  |        | cell cycle |            |
| Dlg1    |        | cell cycle |            |
| Dlgap5  |        | cell cycle |            |
| Dmap1   |        |            | DNA repair |
| Dmc1    |        | cell cycle | DNA repair |
| Dmrt1   |        | cell cycle |            |
| Dmrtd2  |        | cell cycle |            |
| Dmtf1   |        | cell cycle |            |
| Dna2    |        | cell cycle | DNA repair |
| Dnajb1  | cancer |            |            |
| Dnm2    | cancer |            |            |
| Dnmt3a  | cancer |            |            |
| Donson  |        | cell cycle |            |
| Dot1l   |        | cell cycle | DNA repair |
| Dpep3   |        | cell cycle |            |
| Drd2    |        | cell cycle |            |
| Drd3    |        | cell cycle |            |
| Drosha  | cancer |            |            |
| Dscc1   |        | cell cycle |            |
| Dsn1    |        | cell cycle |            |

|               |        |            |            |
|---------------|--------|------------|------------|
| Dstn          |        | cell cycle |            |
| Dtl           |        | cell cycle | DNA repair |
| Dtx3l         |        |            | DNA repair |
| Dusp1         |        | cell cycle |            |
| Dusp3         |        | cell cycle |            |
| Dync1h1       |        | cell cycle |            |
| Dync1li1      |        | cell cycle |            |
| Dynlt1b       |        | cell cycle |            |
| Dynlt3        |        | cell cycle |            |
| E2f1          |        | cell cycle |            |
| E2f2          |        | cell cycle |            |
| E2f3          |        | cell cycle |            |
| E2f4          |        | cell cycle |            |
| E2f5          |        | cell cycle |            |
| E2f6          |        | cell cycle |            |
| E2f7          |        | cell cycle |            |
| E2f8          |        | cell cycle |            |
| E430025E21Rik |        | cell cycle |            |
| E4f1          |        | cell cycle |            |
| Ebf1          | cancer |            |            |
| Ecd           |        | cell cycle |            |
| Ect2          |        | cell cycle |            |
| Ect2l         | cancer |            |            |
| Edn1          |        | cell cycle |            |
| Edn3          |        | cell cycle |            |
| Eef1e1        |        |            | DNA repair |
| Eepd1         |        |            | DNA repair |
| Egf           |        | cell cycle |            |
| Egfr          | cancer | cell cycle | DNA repair |
| Ehmt2         |        | cell cycle |            |
| Eid1          |        | cell cycle |            |
| Eid3          |        |            | DNA repair |
| Eif2ak4       |        | cell cycle |            |
| Eif3e         | cancer |            |            |
| Eif4a2        | cancer |            |            |
| Eif4e         |        | cell cycle |            |
| Eif4ebp1      |        | cell cycle |            |
| Eif4g3        |        | cell cycle |            |
| Elf4          | cancer |            |            |
| Elk4          | cancer |            |            |
| Ell           | cancer |            |            |
| Eln           | cancer |            |            |
| Eme1          |        | cell cycle | DNA repair |
| Eme2          |        | cell cycle | DNA repair |
| Eml1          |        | cell cycle |            |
| Eml4          | cancer |            |            |
| Emsy          |        |            | DNA repair |
| Endov         |        |            | DNA repair |



|         |        |            |            |
|---------|--------|------------|------------|
| Ensa    |        | cell cycle |            |
| Ep300   | cancer | cell cycle |            |
| Epc2    |        |            | DNA repair |
| Epgn    |        | cell cycle |            |
| Eps15   | cancer |            |            |
| Eps8    |        | cell cycle |            |
| ErbB2   | cancer |            |            |
| ErbB3   | cancer |            |            |
| ErbB4   | cancer |            |            |
| Erc1    | cancer |            |            |
| Ercc1   |        | cell cycle | DNA repair |
| Ercc2   | cancer | cell cycle | DNA repair |
| Ercc3   | cancer | cell cycle | DNA repair |
| Ercc4   | cancer | cell cycle | DNA repair |
| Ercc5   | cancer |            | DNA repair |
| Ercc6   |        |            | DNA repair |
| Ercc6l  |        | cell cycle |            |
| Ercc6l2 |        |            | DNA repair |
| Ercc8   |        |            | DNA repair |
| Ereg    |        | cell cycle |            |
| Erg     | cancer |            |            |
| Erh     |        | cell cycle |            |
| Ern1    |        | cell cycle |            |
| Ern2    |        | cell cycle |            |
| Esco1   |        | cell cycle |            |
| Esco2   |        | cell cycle | DNA repair |
| Espl1   |        | cell cycle |            |
| Esr1    | cancer | cell cycle |            |
| Etnk1   | cancer |            |            |
| Etv1    | cancer |            |            |
| Etv4    | cancer |            |            |
| Etv5    | cancer |            |            |
| Etv6    | cancer |            |            |
| Evi5    |        | cell cycle |            |
| Ewsr1   | cancer |            |            |
| Exd1    |        | cell cycle |            |
| Exd2    |        |            | DNA repair |
| Exo1    |        | cell cycle | DNA repair |
| Exo5    |        |            | DNA repair |
| Ext1    | cancer |            |            |
| Ext2    | cancer |            |            |
| Eya1    |        | cell cycle | DNA repair |
| Eya2    |        |            | DNA repair |
| Eya3    |        |            | DNA repair |
| Eya4    |        |            | DNA repair |
| Ezh2    | cancer | cell cycle |            |
| Ezr     | cancer | cell cycle |            |
| Faap100 |        |            | DNA repair |

|         |        |            |            |
|---------|--------|------------|------------|
| Faap20  |        |            | DNA repair |
| Faap24  |        |            | DNA repair |
| Fam131b | cancer |            |            |
| Fam175a |        | cell cycle | DNA repair |
| Fam175b |        | cell cycle |            |
| Fam178a |        | cell cycle | DNA repair |
| Fam20b  |        | cell cycle |            |
| Fam32a  |        | cell cycle |            |
| Fam46c  | cancer |            |            |
| Fam58b  |        | cell cycle |            |
| Fam64a  |        | cell cycle |            |
| Fam83d  |        | cell cycle |            |
| Fan1    |        |            | DNA repair |
| Fanca   | cancer | cell cycle | DNA repair |
| Fancc   | cancer |            | DNA repair |
| Fancc2  | cancer | cell cycle | DNA repair |
| Fance   | cancer |            |            |
| Fanccf  | cancer |            | DNA repair |
| Fanccg  | cancer |            | DNA repair |
| Fanci   |        | cell cycle | DNA repair |
| Fancl   |        |            | DNA repair |
| Fanccm  |        | cell cycle | DNA repair |
| Fap     |        | cell cycle |            |
| Fas     | cancer |            |            |
| Fat1    | cancer |            |            |
| Fat4    | cancer |            |            |
| Fbxl15  |        | cell cycle |            |
| Fbxl7   |        | cell cycle |            |
| Fbxo11  | cancer |            |            |
| Fbxo18  |        |            | DNA repair |
| Fbxo31  |        | cell cycle |            |
| Fbxo4   |        | cell cycle |            |
| Fbxo43  |        | cell cycle |            |
| Fbxo5   |        | cell cycle |            |
| Fbxo6   |        |            | DNA repair |
| Fbxo7   |        | cell cycle |            |
| Fbxw11  |        | cell cycle |            |
| Fbxw5   |        | cell cycle |            |
| Fbxw7   | cancer | cell cycle |            |
| Fcgr2b  | cancer |            |            |
| Fcgr3   | cancer |            |            |
| Fem1b   |        | cell cycle |            |
| Fen1    |        |            | DNA repair |
| Fer     |        | cell cycle |            |
| Fev     | cancer |            |            |
| Fgf10   |        | cell cycle | DNA repair |
| Fgf2    |        | cell cycle |            |

|         |        |            |                       |
|---------|--------|------------|-----------------------|
| Fgf8    |        | cell cycle |                       |
| Fgfr1   | cancer | cell cycle |                       |
| Fgfr1op | cancer |            |                       |
| Fgfr2   | cancer | cell cycle |                       |
| Fgfr3   | cancer | cell cycle |                       |
| Fgfr4   | cancer |            |                       |
| Fggy    |        | cell cycle |                       |
| Fh1     | cancer |            |                       |
| Fhit    | cancer |            |                       |
| Fhl1    |        | cell cycle |                       |
| Fign    |        | cell cycle | DNA repair            |
| Figl1   |        | cell cycle | DNA repair            |
| Figl2   |        |            | DNA repair            |
| Fip1l1  | cancer |            |                       |
| Fkbp6   |        | cell cycle |                       |
| Flcn    | cancer | cell cycle |                       |
| Fli1    | cancer |            |                       |
| Flna    |        | cell cycle |                       |
| Flt3    | cancer |            |                       |
| Flt3l   |        | cell cycle |                       |
| Flt4    | cancer |            |                       |
| Fmn2    |        | cell cycle |                       |
| Fmo2    |        |            | xenobiotic metabolism |
| Fn3k    |        | cell cycle |                       |
| Fn3krp  |        | cell cycle |                       |
| Fnbp1   | cancer |            |                       |
| Fnta    |        | cell cycle |                       |
| Fntb    |        | cell cycle |                       |
| Fosl1   |        | cell cycle |                       |
| Foxa1   | cancer | cell cycle |                       |
| Foxc1   |        | cell cycle |                       |
| Foxe3   |        | cell cycle |                       |
| Foxg1   |        | cell cycle |                       |
| Foxl2   | cancer |            |                       |
| Foxm1   |        | cell cycle | DNA repair            |
| Foxn3   |        | cell cycle |                       |
| Foxo1   | cancer |            |                       |
| Foxo3   | cancer |            |                       |
| Foxo4   | cancer | cell cycle |                       |
| Foxp1   | cancer |            |                       |
| Fsd1    |        | cell cycle |                       |
| Fstl3   | cancer |            |                       |
| Fto     |        |            | DNA repair            |
| Fubp1   | cancer |            |                       |
| Fus     | cancer |            |                       |
| Fzd3    |        | cell cycle |                       |
| Fzr1    |        | cell cycle | DNA repair            |
| Gadd45a |        | cell cycle |                       |

|            |        |            |            |
|------------|--------|------------|------------|
| Gadd45b    |        | cell cycle |            |
| Gadd45g    |        | cell cycle |            |
| Gadd45gip1 |        | cell cycle |            |
| Gak        |        | cell cycle |            |
| Gas1       |        | cell cycle |            |
| Gas2       |        | cell cycle |            |
| Gas2l1     |        | cell cycle |            |
| Gas7       | cancer |            |            |
| Gata1      | cancer |            |            |
| Gata2      | cancer |            |            |
| Gata3      | cancer | cell cycle |            |
| Gata6      |        | cell cycle |            |
| Gbf1       |        | cell cycle |            |
| Gck        |        | cell cycle |            |
| Gdpd5      |        | cell cycle |            |
| Gem        |        | cell cycle |            |
| Gen1       |        | cell cycle | DNA repair |
| Ggn        |        |            | DNA repair |
| Gigyf2     |        | cell cycle |            |
| Gins1      |        | cell cycle |            |
| Gins2      |        | cell cycle | DNA repair |
| Gins4      |        |            | DNA repair |
| Gipc1      |        | cell cycle |            |
| Git1       |        | cell cycle |            |
| Gm10696    | cancer |            |            |
| Gm10697    | cancer |            |            |
| Gm14459    | cancer |            |            |
| Gm20431    |        |            | DNA repair |
| Gm21876    | cancer |            |            |
| Gm37596    | cancer |            |            |
| Gm4778     | cancer |            |            |
| Gm4858     | cancer |            |            |
| Gm5286     | cancer |            |            |
| Gm5611     | cancer |            |            |
| Gm5751     | cancer |            |            |
| Gm5773     | cancer |            |            |
| Gm6592     | cancer |            |            |
| Gm6768     | cancer |            |            |
| Gm9117     | cancer |            |            |
| Gm9125     | cancer |            |            |
| Gm960      |        | cell cycle |            |
| Gmnc       |        | cell cycle |            |
| Gmnn       |        | cell cycle |            |
| Gmps       | cancer |            |            |
| Gna11      | cancer |            |            |
| Gnai1      |        | cell cycle |            |
| Gnai2      |        | cell cycle |            |
| Gnai3      |        | cell cycle |            |

|                    |            |             |            |                       |
|--------------------|------------|-------------|------------|-----------------------|
| Gnaq               | cancer     |             |            |                       |
| Gnas               | cancer     |             |            |                       |
| Golga2             |            | cell cycle  |            |                       |
| Golga5             | cancer     |             |            |                       |
| Gopc               | cancer     |             |            |                       |
| Gpc3               | cancer     |             |            |                       |
| Gper1              |            | cell cycle  |            |                       |
| Gphn               | cancer     |             |            |                       |
| Gpr132             |            | cell cycle  |            |                       |
| Gpr3               |            | cell cycle  |            |                       |
| Gpsm2              |            | cell cycle  |            |                       |
| <b>Grand Total</b> | <b>641</b> | <b>1432</b> | <b>407</b> | <b>45</b>             |
| Grin1              |            |             |            | xenobiotic metabolism |
| Grin2a             | cancer     |             |            |                       |
| Grk5               |            | cell cycle  |            |                       |
| Gsg2               |            | cell cycle  |            |                       |
| Gsk3b              |            | cell cycle  |            |                       |
| Gspt2              |            | cell cycle  |            |                       |
| Gstm2              |            |             |            | xenobiotic metabolism |
| Gstm4              |            |             |            | xenobiotic metabolism |
| Gstm5              |            |             |            | xenobiotic metabolism |
| Gstm7              |            |             |            | xenobiotic metabolism |
| Gsto1              |            |             |            | xenobiotic metabolism |
| Gsto2              |            |             |            | xenobiotic metabolism |
| Gstt1              |            |             |            | xenobiotic metabolism |
| Gtf2h1             |            |             | DNA repair |                       |
| Gtf2h2             |            |             | DNA repair |                       |
| Gtf2h3             |            |             | DNA repair |                       |
| Gtf2h4             |            |             | DNA repair |                       |
| Gtf2h5             |            |             | DNA repair |                       |
| Gtpbp4             |            | cell cycle  |            |                       |
| H1foo              |            | cell cycle  |            |                       |
| H2afx              |            | cell cycle  | DNA repair |                       |
| H2afy              |            | cell cycle  |            |                       |
| H2-BI              | cancer     |             |            |                       |
| H3f3b              | cancer     |             |            |                       |
| Hacd1              |            | cell cycle  |            |                       |
| Hace1              |            | cell cycle  |            |                       |
| Haus1              |            | cell cycle  |            |                       |
| Haus2              |            | cell cycle  |            |                       |
| Haus3              |            | cell cycle  |            |                       |
| Haus4              |            | cell cycle  |            |                       |
| Haus5              |            | cell cycle  |            |                       |
| Haus6              |            | cell cycle  |            |                       |
| Haus7              |            | cell cycle  |            |                       |
| Haus8              |            | cell cycle  |            |                       |
| Hcfc1              |            | cell cycle  |            |                       |
| Hdac3              |            | cell cycle  |            |                       |

|           |        |            |                       |
|-----------|--------|------------|-----------------------|
| Hdac8     |        | cell cycle |                       |
| Heca      |        | cell cycle |                       |
| Helb      |        |            | DNA repair            |
| Hells     |        | cell cycle |                       |
| Helq      |        |            | DNA repair            |
| Hepacam   |        | cell cycle |                       |
| Hepacam2  |        | cell cycle |                       |
| Herc2     |        |            | DNA repair            |
| Herpud1   | cancer |            |                       |
| Hes1      |        | cell cycle |                       |
| Hexim1    |        | cell cycle |                       |
| Hexim2    |        | cell cycle |                       |
| Hey1      | cancer |            |                       |
| Hfm1      |        | cell cycle |                       |
| Hhex      |        | cell cycle |                       |
| Hif1a     | cancer |            |                       |
| Hinfp     |        | cell cycle | DNA repair            |
| Hip1      | cancer |            |                       |
| Hist1h3i  | cancer |            |                       |
| Hist3h2a  |        |            | DNA repair            |
| Hjurp     |        | cell cycle |                       |
| Hk1       |        | cell cycle |                       |
| Hk2       |        | cell cycle |                       |
| Hk3       |        | cell cycle |                       |
| Hlf       | cancer |            |                       |
| Hltf      |        |            | DNA repair            |
| Hmg20b    |        | cell cycle |                       |
| Hmga1     | cancer |            | DNA repair            |
| Hmga1-rs1 | cancer |            |                       |
| Hmga2     | cancer | cell cycle | DNA repair            |
| Hmgb1     |        | cell cycle | DNA repair            |
| Hmgn1     |        |            | DNA repair            |
| Hnf1a     | cancer |            |                       |
| Hnf4a     |        | cell cycle | xenobiotic metabolism |
| Hnrnpa2b1 | cancer |            |                       |
| Hook3     | cancer |            |                       |
| Hormad1   |        | cell cycle |                       |
| Hormad2   |        | cell cycle |                       |
| Hoxa11    | cancer |            |                       |
| Hoxa13    | cancer | cell cycle |                       |
| Hoxa9     | cancer |            |                       |
| Hoxc11    | cancer |            |                       |
| Hoxc13    | cancer |            |                       |
| Hoxd11    | cancer |            |                       |
| Hoxd13    | cancer |            |                       |
| Hpgd      |        | cell cycle |                       |
| Hras      | cancer | cell cycle |                       |
| Hsf1      |        | cell cycle |                       |

|          |        |            |            |
|----------|--------|------------|------------|
| Hsp90aa1 | cancer |            |            |
| Hsp90ab1 | cancer |            |            |
| Hspa1a   |        |            | DNA repair |
| Hspa2    |        | cell cycle |            |
| Hspa8    |        | cell cycle |            |
| Htatip2  |        | cell cycle |            |
| Htt      |        | cell cycle |            |
| Hus1     |        | cell cycle | DNA repair |
| Hus1b    |        | cell cycle | DNA repair |
| Huwe1    |        |            | DNA repair |
| Id2      |        | cell cycle |            |
| Id3      |        | cell cycle |            |
| Id4      |        | cell cycle |            |
| Idh1     | cancer |            |            |
| Idh2     | cancer |            |            |
| Ier3     |        | cell cycle | DNA repair |
| Ifng     |        | cell cycle |            |
| Ifnz     |        | cell cycle |            |
| Igf1     |        | cell cycle |            |
| Igf1r    |        | cell cycle |            |
| Igf2     |        | cell cycle |            |
| Ikbkb    | cancer |            |            |
| Ikzf1    | cancer | cell cycle |            |
| Il12a    |        | cell cycle |            |
| Il12b    |        | cell cycle |            |
| Il1a     |        | cell cycle |            |
| Il1b     |        | cell cycle |            |
| Il2      | cancer |            |            |
| Il21r    | cancer |            |            |
| Il6st    | cancer |            |            |
| Il7r     | cancer |            |            |
| Ilk      |        | cell cycle |            |
| Ilkap    |        | cell cycle |            |
| Inca1    |        | cell cycle |            |
| Incenp   |        | cell cycle |            |
| Ing1     |        | cell cycle |            |
| Ing2     |        | cell cycle |            |
| Ing4     |        | cell cycle |            |
| Inha     |        | cell cycle |            |
| Inhba    |        | cell cycle |            |
| Inip     |        |            | DNA repair |
| Ino80    |        | cell cycle | DNA repair |
| Ino80b   |        |            | DNA repair |
| Ino80c   |        |            | DNA repair |
| Ino80d   |        |            | DNA repair |
| Ins2     |        | cell cycle |            |
| Insc     |        | cell cycle |            |
| Insm1    |        | cell cycle |            |

|         |        |            |            |
|---------|--------|------------|------------|
| Insr    |        | cell cycle |            |
| Ints3   |        | cell cycle | DNA repair |
| Ints7   |        | cell cycle |            |
| Iqgap3  |        | cell cycle |            |
| Irf1    |        | cell cycle |            |
| Irf4    | cancer |            |            |
| Irf6    |        | cell cycle |            |
| Ist1    |        | cell cycle |            |
| Itgb1   |        | cell cycle |            |
| Itgb3bp |        | cell cycle |            |
| Itk     | cancer |            |            |
| Jade1   |        | cell cycle |            |
| Jak1    | cancer |            |            |
| Jak2    | cancer |            |            |
| Jak3    | cancer |            |            |
| Jazf1   | cancer |            |            |
| Jmy     |        | cell cycle | DNA repair |
| Jtb     |        | cell cycle |            |
| Jun     | cancer | cell cycle |            |
| Junb    |        | cell cycle |            |
| Jund    |        | cell cycle |            |
| Kank2   |        | cell cycle |            |
| Kat2b   |        | cell cycle |            |
| Kat5    |        |            | DNA repair |
| Kat6a   | cancer |            |            |
| Kat6b   | cancer |            |            |
| Katna1  |        | cell cycle |            |
| Katnb1  |        | cell cycle |            |
| Kcna5   |        | cell cycle |            |
| Kcnh5   |        | cell cycle |            |
| Kcnj5   | cancer |            |            |
| Kctd11  |        | cell cycle |            |
| Kdm1a   |        |            | DNA repair |
| Kdm2a   |        |            | DNA repair |
| Kdm4d   |        |            | DNA repair |
| Kdm5a   | cancer |            |            |
| Kdm5c   | cancer |            |            |
| Kdm6a   | cancer |            |            |
| Kdm8    |        | cell cycle |            |
| Kdr     | cancer |            |            |
| Kdsr    | cancer |            |            |
| Keap1   | cancer |            |            |
| Khdc3   |        | cell cycle |            |
| Khdrbs1 |        | cell cycle |            |
| Kif11   |        | cell cycle |            |
| Kif13a  |        | cell cycle |            |
| Kif14   |        | cell cycle |            |
| Kif18a  |        | cell cycle |            |



|           |        |            |            |
|-----------|--------|------------|------------|
| Kif18b    |        | cell cycle |            |
| Kif20a    |        | cell cycle |            |
| Kif20b    |        | cell cycle |            |
| Kif22     |        | cell cycle | DNA repair |
| Kif23     |        | cell cycle |            |
| Kif2a     |        | cell cycle |            |
| Kif2b     |        | cell cycle |            |
| Kif2c     |        | cell cycle |            |
| Kif3b     |        | cell cycle |            |
| Kif4      |        | cell cycle |            |
| Kif5b     | cancer |            |            |
| Kifc1     |        | cell cycle |            |
| Kin       |        |            | DNA repair |
| Kit       | cancer |            |            |
| Kiz       |        | cell cycle |            |
| Klf11     |        | cell cycle |            |
| Klf4      | cancer |            |            |
| Klf6      | cancer |            |            |
| Klhdc3    |        | cell cycle |            |
| Klhl13    |        | cell cycle |            |
| Klhl21    |        | cell cycle |            |
| Klhl22    |        | cell cycle |            |
| Klhl42    |        | cell cycle |            |
| Klhl9     |        | cell cycle |            |
| Klk1      | cancer |            |            |
| Klk1b1    | cancer |            |            |
| Klk1b11   | cancer |            |            |
| Klk1b16   | cancer |            |            |
| Klk1b21   | cancer |            |            |
| Klk1b22   | cancer |            |            |
| Klk1b24   | cancer |            |            |
| Klk1b26   | cancer |            |            |
| Klk1b27   | cancer |            |            |
| Klk1b3    | cancer |            |            |
| Klk1b4    | cancer |            |            |
| Klk1b5    | cancer |            |            |
| Klk1b8    | cancer |            |            |
| Klk1b9    | cancer |            |            |
| Kmt2a     | cancer |            |            |
| Kmt2c     | cancer |            |            |
| Kmt2d     | cancer |            |            |
| Kmt2e     |        | cell cycle |            |
| Kmt5a     |        | cell cycle |            |
| Knstrn    |        | cell cycle |            |
| Kntc1     |        | cell cycle |            |
| Kpnb1     |        | cell cycle |            |
| Kras      | cancer |            |            |
| Krtap21-1 |        | cell cycle |            |

|          |        |            |                       |
|----------|--------|------------|-----------------------|
| Ktn1     | cancer |            |                       |
| L3mbtl1  |        | cell cycle |                       |
| Larp7    |        | cell cycle |                       |
| Lasp1    | cancer |            |                       |
| Lats1    |        | cell cycle |                       |
| Lats2    |        | cell cycle |                       |
| Lck      | cancer |            |                       |
| Lcmt1    |        | cell cycle |                       |
| Lcp1     | cancer |            |                       |
| Lef1     | cancer |            |                       |
| Lemd3    |        | cell cycle |                       |
| Lep      |        | cell cycle |                       |
| Lfng     |        | cell cycle |                       |
| Lhfp     | cancer |            |                       |
| Lif      |        | cell cycle |                       |
| Lifr     | cancer |            |                       |
| Lig1     |        | cell cycle | DNA repair            |
| Lig3     |        | cell cycle | DNA repair            |
| Lig4     |        | cell cycle | DNA repair            |
| Lin37    |        | cell cycle |                       |
| Lin54    |        | cell cycle |                       |
| Lin9     |        | cell cycle |                       |
| Llgl1    |        | cell cycle |                       |
| Llgl2    |        | cell cycle |                       |
| Lmln     |        | cell cycle |                       |
| Lmna     | cancer |            |                       |
| Lmnb1    |        | cell cycle |                       |
| Lmo1     | cancer |            |                       |
| Lmo2     | cancer |            |                       |
| Lpo      |        |            | xenobiotic metabolism |
| Lpp      | cancer |            |                       |
| Lrig3    | cancer |            |                       |
| Lrp1b    | cancer |            |                       |
| Lrp5     |        | cell cycle |                       |
| Lrp6     |        | cell cycle |                       |
| Lrrcc1   |        | cell cycle |                       |
| Lsm10    |        | cell cycle |                       |
| Lsm11    |        | cell cycle |                       |
| Lsm14a   | cancer |            |                       |
| Lyl1     | cancer |            |                       |
| Lztr1    | cancer |            |                       |
| Lzts1    |        | cell cycle |                       |
| Lzts2    |        | cell cycle |                       |
| M1ap     |        | cell cycle |                       |
| Mad1l1   |        | cell cycle |                       |
| Mad2l1   |        | cell cycle |                       |
| Mad2l1bp |        | cell cycle |                       |
| Mad2l2   |        | cell cycle | DNA repair            |

|          |        |            |            |
|----------|--------|------------|------------|
| Madd     |        | cell cycle |            |
| Maea     |        | cell cycle |            |
| Mael     |        | cell cycle |            |
| Maf      | cancer |            |            |
| Mafb     | cancer |            |            |
| Magi2    |        | cell cycle |            |
| Malt1    | cancer |            |            |
| Maml2    | cancer |            |            |
| Map10    |        | cell cycle |            |
| Map2k1   | cancer | cell cycle |            |
| Map2k2   | cancer |            |            |
| Map2k4   | cancer |            |            |
| Map3k1   | cancer |            |            |
| Map3k13  | cancer |            |            |
| Map3k8   |        | cell cycle |            |
| Map4     |        | cell cycle |            |
| Map9     |        | cell cycle |            |
| Mapk1    | cancer | cell cycle |            |
| Mapk12   |        | cell cycle |            |
| Mapk13   |        | cell cycle |            |
| Mapk14   |        | cell cycle |            |
| Mapk1ip1 |        | cell cycle |            |
| Mapk3    |        | cell cycle |            |
| Mapk4    |        | cell cycle |            |
| Mapk6    |        | cell cycle |            |
| Mapk7    |        | cell cycle |            |
| Mapkapk2 |        | cell cycle |            |
| Mapre1   |        | cell cycle |            |
| Mapre2   |        | cell cycle |            |
| Mapre3   |        | cell cycle |            |
| Marf1    |        | cell cycle | DNA repair |
| Mark4    |        | cell cycle |            |
| Marveld1 |        | cell cycle |            |
| Mastl    |        | cell cycle |            |
| Mau2     |        | cell cycle |            |
| Max      | cancer |            |            |
| Mbd4     |        | cell cycle | DNA repair |
| Mc1r     |        |            | DNA repair |
| Mcidas   |        | cell cycle |            |
| Mcm2     |        | cell cycle |            |
| Mcm3     |        | cell cycle |            |
| Mcm4     |        | cell cycle |            |
| Mcm5     |        | cell cycle |            |
| Mcm6     |        | cell cycle |            |
| Mcm7     |        | cell cycle |            |
| Mcm8     |        | cell cycle | DNA repair |
| Mcm9     |        |            | DNA repair |
| Mcmbp    |        | cell cycle |            |

|           |        |            |            |
|-----------|--------|------------|------------|
| McpH1     |        | cell cycle |            |
| Mcrs1     |        |            | DNA repair |
| Mcts1     |        | cell cycle |            |
| Mdc1      |        | cell cycle | DNA repair |
| Mdm1      |        | cell cycle |            |
| Mdm2      | cancer | cell cycle |            |
| Mdm4      | cancer | cell cycle |            |
| Mecom     | cancer | cell cycle |            |
| Med1      |        | cell cycle |            |
| Med12     | cancer |            |            |
| Med25     |        | cell cycle |            |
| Mei1      |        | cell cycle |            |
| Mei4      |        | cell cycle |            |
| Meig1     |        | cell cycle |            |
| Meikin    |        | cell cycle |            |
| Meiob     |        | cell cycle | DNA repair |
| Meioc     |        | cell cycle | DNA repair |
| Melk      |        | cell cycle |            |
| Men1      | cancer | cell cycle |            |
| Mepce     |        | cell cycle |            |
| Met       | cancer | cell cycle |            |
| Mgme1     |        |            | DNA repair |
| Mgmt      |        |            | DNA repair |
| Mif       |        | cell cycle |            |
| Miip      |        | cell cycle |            |
| Mir124a-1 |        | cell cycle |            |
| Mir124a-2 |        | cell cycle |            |
| Mir124a-3 |        | cell cycle |            |
| Mir16-1   |        | cell cycle |            |
| Mir214    |        | cell cycle |            |
| Mir26a-1  |        | cell cycle |            |
| Mir26a-2  |        | cell cycle |            |
| Mir26b    |        | cell cycle |            |
| Mir744    |        | cell cycle |            |
| Mis12     |        | cell cycle |            |
| Mis18a    |        | cell cycle |            |
| Mis18bp1  |        | cell cycle |            |
| Misp      |        | cell cycle |            |
| Mitd1     |        | cell cycle |            |
| Mitf      | cancer |            |            |
| Mki67     |        | cell cycle |            |
| Mkl1      | cancer |            |            |
| Mlf1      | cancer | cell cycle |            |
| Mlh1      | cancer | cell cycle | DNA repair |
| Mlh3      |        | cell cycle | DNA repair |
| Mllt1     | cancer |            |            |
| Mllt10    | cancer |            |            |
| Mllt11    | cancer |            |            |

|         |        |            |            |
|---------|--------|------------|------------|
| Mllt3   | cancer |            |            |
| Mllt4   | cancer |            |            |
| Mllt6   | cancer |            |            |
| Mlxipl  |        | cell cycle |            |
| Mms19   |        |            | DNA repair |
| Mms22l  |        |            | DNA repair |
| Mn1     | cancer |            |            |
| Mnat1   |        | cell cycle | DNA repair |
| Mnd1    |        | cell cycle | DNA repair |
| Mns1    |        | cell cycle |            |
| Mnt     |        | cell cycle |            |
| Mnx1    | cancer |            |            |
| Morf4l1 |        |            | DNA repair |
| Morf4l2 |        |            | DNA repair |
| Mos     |        | cell cycle |            |
| Mov10l1 |        | cell cycle |            |
| Mpg     |        |            | DNA repair |
| Mpl     | cancer |            |            |
| Mplkip  |        | cell cycle |            |
| Mre11a  |        | cell cycle | DNA repair |
| Mrpl41  |        | cell cycle |            |
| Ms4a3   |        | cell cycle |            |
| Msh2    | cancer | cell cycle | DNA repair |
| Msh3    |        | cell cycle | DNA repair |
| Msh4    |        | cell cycle | DNA repair |
| Msh5    |        | cell cycle | DNA repair |
| Msh6    | cancer | cell cycle | DNA repair |
| Msi2    | cancer |            |            |
| Msn     | cancer |            |            |
| Msx1    |        | cell cycle |            |
| Msx2    |        | cell cycle |            |
| Mta1    |        |            | DNA repair |
| Mta3    |        | cell cycle |            |
| Mtbp    |        | cell cycle |            |
| Mtcp1   | cancer |            |            |
| Mtor    | cancer |            | DNA repair |
| Mtus1   |        | cell cycle |            |
| Muc1    | cancer |            |            |
| Mum1    |        |            | DNA repair |
| Mus81   |        |            | DNA repair |
| Mutyh   | cancer |            | DNA repair |
| Myb     | cancer | cell cycle |            |
| Mybbp1a |        | cell cycle |            |
| Mybl2   |        | cell cycle |            |
| Myc     | cancer | cell cycle |            |
| Mycl    | cancer |            |            |
| Mycn    | cancer |            |            |
| Myd88   | cancer |            |            |

|         |        |            |                       |
|---------|--------|------------|-----------------------|
| Myh10   |        | cell cycle |                       |
| Myh11   | cancer |            |                       |
| Myh9    | cancer | cell cycle |                       |
| Mylk2   |        | cell cycle |                       |
| Myo5a   | cancer |            |                       |
| Myocd   |        | cell cycle |                       |
| Myod1   | cancer |            |                       |
| Myog    |        | cell cycle |                       |
| Mzt1    |        | cell cycle |                       |
| Naa50   |        | cell cycle |                       |
| Nab2    | cancer |            |                       |
| Nabp1   |        | cell cycle | DNA repair            |
| Nabp2   |        | cell cycle | DNA repair            |
| Nacc2   |        | cell cycle |                       |
| Nae1    |        | cell cycle |                       |
| Nanog   |        | cell cycle |                       |
| Nanos2  |        | cell cycle |                       |
| Nanos3  |        | cell cycle |                       |
| Nasp    |        | cell cycle |                       |
| Nbn     | cancer | cell cycle | DNA repair            |
| Ncapd2  |        | cell cycle |                       |
| Ncapd3  |        | cell cycle |                       |
| Ncapg   |        | cell cycle |                       |
| Ncapg2  |        | cell cycle |                       |
| Ncaph   |        | cell cycle |                       |
| Nceh1   |        |            | xenobiotic metabolism |
| Nckipsd | cancer |            |                       |
| Ncoa1   | cancer |            |                       |
| Ncoa2   | cancer |            |                       |
| Ncoa4   | cancer |            |                       |
| Ncor1   | cancer | cell cycle |                       |
| Ncor2   | cancer |            |                       |
| Ndc1    |        | cell cycle |                       |
| Ndc80   |        | cell cycle |                       |
| Nde1    |        | cell cycle |                       |
| Ndel1   |        | cell cycle |                       |
| Ndnl2   |        |            | DNA repair            |
| Ndrp1   | cancer | cell cycle |                       |
| Nedd1   |        | cell cycle |                       |
| Nedd9   |        | cell cycle |                       |
| Neil1   |        |            | DNA repair            |
| Neil2   |        |            | DNA repair            |
| Neil3   |        |            | DNA repair            |
| Nek1    |        | cell cycle |                       |
| Nek11   |        | cell cycle |                       |
| Nek2    |        | cell cycle |                       |
| Nek3    |        | cell cycle |                       |
| Nek4    |        | cell cycle |                       |

|         |        |            |                       |
|---------|--------|------------|-----------------------|
| Nek6    |        | cell cycle |                       |
| Nek9    |        | cell cycle |                       |
| Nell1   |        | cell cycle |                       |
| Neurod1 |        | cell cycle |                       |
| Neurog1 |        | cell cycle |                       |
| Nf1     | cancer |            |                       |
| Nf2     | cancer |            |                       |
| Nfatc1  |        | cell cycle |                       |
| Nfatc2  | cancer |            |                       |
| Nfe2l2  | cancer |            |                       |
| Nfib    | cancer |            |                       |
| Nfkb2   | cancer |            |                       |
| Nfkbie  | cancer |            |                       |
| Nfrkb   |        |            | DNA repair            |
| Nhej1   |        |            | DNA repair            |
| Nin     | cancer |            |                       |
| Nipbl   |        | cell cycle |                       |
| Nkx2-1  | cancer |            |                       |
| Nkx3-1  |        | cell cycle |                       |
| Nle1    |        | cell cycle |                       |
| Nlrc4   |        | cell cycle |                       |
| Nme6    |        | cell cycle |                       |
| Nol9    |        | cell cycle |                       |
| Nono    | cancer |            | DNA repair            |
| Notch1  | cancer |            |                       |
| Notch2  | cancer | cell cycle |                       |
| Npas2   |        |            | DNA repair            |
| Npat    |        | cell cycle |                       |
| Npm1    | cancer | cell cycle | DNA repair            |
| Npm2    |        | cell cycle |                       |
| Nppc    |        | cell cycle |                       |
| Npr2    |        | cell cycle |                       |
| Nr1i2   |        |            | xenobiotic metabolism |
| Nr2c2   |        | cell cycle |                       |
| Nr2e1   |        | cell cycle |                       |
| Nr2f2   |        | cell cycle |                       |
| Nr4a1   |        | cell cycle |                       |
| Nr4a3   | cancer | cell cycle |                       |
| Nras    | cancer | cell cycle |                       |
| Nrg1    | cancer |            |                       |
| Nsd1    | cancer |            |                       |
| Nsl1    |        | cell cycle |                       |
| Nsmce1  |        |            | DNA repair            |
| Nsmce2  |        | cell cycle | DNA repair            |
| Nsun2   |        | cell cycle |                       |
| Nt5c2   | cancer |            |                       |
| Nth1    |        |            | DNA repair            |
| Ntmt1   |        | cell cycle |                       |

|          |        |            |            |
|----------|--------|------------|------------|
| Ntrk1    | cancer |            |            |
| Ntrk3    | cancer |            |            |
| Nubp1    |        | cell cycle |            |
| Nucks1   |        |            | DNA repair |
| Nudc     |        | cell cycle |            |
| Nudt1    |        |            | DNA repair |
| Nudt16   |        | cell cycle | DNA repair |
| Nuf2     |        | cell cycle |            |
| Numa1    | cancer | cell cycle |            |
| Nup153   |        | cell cycle |            |
| Nup214   | cancer | cell cycle |            |
| Nup37    |        | cell cycle |            |
| Nup43    |        | cell cycle |            |
| Nup62    |        | cell cycle |            |
| Nup88    |        | cell cycle |            |
| Nup98    | cancer |            |            |
| Nupr1    |        | cell cycle |            |
| Nupr1l   |        | cell cycle |            |
| Nusap1   |        | cell cycle |            |
| Nutm1    | cancer |            |            |
| Nutm2    | cancer |            |            |
| Ofd1     |        | cell cycle |            |
| Ogg1     |        |            | DNA repair |
| Oip5     |        | cell cycle |            |
| Olig2    | cancer |            |            |
| Omd      | cancer |            |            |
| Opn1mw   |        | cell cycle |            |
| Oraov1   |        | cell cycle | DNA repair |
| Orc1     |        | cell cycle |            |
| Orc3     |        | cell cycle |            |
| Osm      |        | cell cycle |            |
| Otub1    |        |            | DNA repair |
| Ovol1    |        | cell cycle |            |
| Pafah1b1 |        | cell cycle |            |
| Pafah1b2 | cancer |            |            |
| Pagr1a   |        | cell cycle |            |
| Pak2     |        | cell cycle |            |
| Pak4     |        | cell cycle |            |
| Palb2    | cancer |            | DNA repair |
| Papd5    |        | cell cycle |            |
| Papd7    |        | cell cycle |            |
| Pard3    |        | cell cycle |            |
| Pard3b   |        | cell cycle |            |
| Pard6a   |        | cell cycle |            |
| Pard6b   |        | cell cycle |            |
| Pard6g   |        | cell cycle |            |
| Parg     |        |            | DNA repair |
| Parp1    |        |            | DNA repair |



|          |        |            |            |
|----------|--------|------------|------------|
| Parp2    |        |            | DNA repair |
| Parp3    |        | cell cycle | DNA repair |
| Parp9    |        |            | DNA repair |
| Parpbp   |        |            | DNA repair |
| Pax3     | cancer |            |            |
| Pax5     | cancer |            |            |
| Pax6     |        | cell cycle |            |
| Pax7     | cancer |            |            |
| Pax8     | cancer |            |            |
| Paxip1   |        | cell cycle | DNA repair |
| Pbrm1    | cancer |            |            |
| Pbx1     | cancer | cell cycle |            |
| Pcid2    |        | cell cycle |            |
| Pcm1     | cancer |            |            |
| Pcna     |        | cell cycle | DNA repair |
| Pcnp     |        | cell cycle |            |
| Pcnt     |        | cell cycle |            |
| Pcsk7    | cancer |            |            |
| Pdcd1lg2 | cancer |            |            |
| Pdcd2l   |        | cell cycle |            |
| Pdcd6ip  |        | cell cycle |            |
| Pde3a    |        | cell cycle |            |
| Pde4dip  | cancer |            |            |
| Pdgfb    | cancer | cell cycle |            |
| Pdgfrb   | cancer | cell cycle |            |
| Pdpm     |        | cell cycle |            |
| Pds5a    |        | cell cycle | DNA repair |
| Pds5b    |        | cell cycle | DNA repair |
| Pea15a   |        | cell cycle |            |
| Pebp1    |        | cell cycle |            |
| Pelo     |        | cell cycle |            |
| Per1     | cancer |            |            |
| Per2     |        | cell cycle |            |
| Pes1     |        | cell cycle |            |
| Pggt1b   |        | cell cycle |            |
| Phactr4  |        | cell cycle |            |
| Phb2     |        | cell cycle |            |
| Phf13    |        | cell cycle |            |
| Phf6     | cancer |            |            |
| Phf8     |        | cell cycle |            |
| Phgdh    |        | cell cycle |            |
| Phip     |        | cell cycle |            |
| Phox2b   | cancer |            |            |
| Pias1    |        | cell cycle |            |
| Pibf1    |        | cell cycle |            |
| Picalm   | cancer |            |            |
| Pid1     |        | cell cycle |            |
| Pidd1    |        | cell cycle |            |

|         |        |            |            |
|---------|--------|------------|------------|
| Pif1    |        |            | DNA repair |
| Pik3c3  |        | cell cycle |            |
| Pik3ca  | cancer |            |            |
| Pik3r1  | cancer |            |            |
| Pik3r4  |        | cell cycle |            |
| Pim1    | cancer | cell cycle |            |
| Pim2    |        | cell cycle |            |
| Pim3    |        | cell cycle |            |
| Pin1    |        | cell cycle |            |
| Pinx1   |        | cell cycle |            |
| Piwil1  |        | cell cycle |            |
| Piwil2  |        | cell cycle |            |
| Piwil4  |        | cell cycle |            |
| Pkd1    |        | cell cycle |            |
| Pkd2    |        | cell cycle |            |
| Pkhd1   |        | cell cycle |            |
| Pkia    |        | cell cycle |            |
| Pkmyt1  |        | cell cycle |            |
| Pkn2    |        | cell cycle |            |
| Pkp4    |        | cell cycle |            |
| Pla2g16 |        | cell cycle |            |
| Plag1   | cancer |            |            |
| Plcb1   |        | cell cycle |            |
| Plcg1   | cancer |            |            |
| Pld6    |        | cell cycle |            |
| Plk1    |        | cell cycle |            |
| Plk2    |        | cell cycle |            |
| Plk3    |        | cell cycle |            |
| Plk4    |        | cell cycle |            |
| Plk5    |        | cell cycle |            |
| Plrg1   |        | cell cycle |            |
| Pmf1    |        | cell cycle |            |
| Pml     | cancer | cell cycle | DNA repair |
| Pmp22   |        | cell cycle |            |
| Pms1    | cancer |            | DNA repair |
| Pms2    | cancer | cell cycle | DNA repair |
| Pnkp    |        |            | DNA repair |
| Pnp     |        |            | DNA repair |
| Pnpt1   |        | cell cycle |            |
| Poc1a   |        | cell cycle |            |
| Poc5    |        | cell cycle |            |
| Pogz    |        | cell cycle |            |
| Pola1   |        |            | DNA repair |
| Polb    |        |            | DNA repair |
| Pold1   |        |            | DNA repair |
| Pold3   |        |            | DNA repair |
| Pold4   |        |            | DNA repair |
| Poldip2 |        | cell cycle |            |

|          |        |            |                       |
|----------|--------|------------|-----------------------|
| Pole     | cancer | cell cycle | DNA repair            |
| Pole2    |        |            | DNA repair            |
| Polg2    |        |            | DNA repair            |
| Polh     |        |            | DNA repair            |
| Poli     |        |            | DNA repair            |
| Polk     |        |            | DNA repair            |
| Poll     |        |            | DNA repair            |
| Polm     |        |            | DNA repair            |
| Poln     |        |            | DNA repair            |
| Polq     |        |            | DNA repair            |
| Polr2i   |        |            | DNA repair            |
| Pomk     |        | cell cycle |                       |
| Pon3     |        |            | xenobiotic metabolism |
| Pot1a    | cancer |            |                       |
| Pot1b    | cancer |            |                       |
| Pou2af1  | cancer |            |                       |
| Pou4f1   |        | cell cycle |                       |
| Pou5f1   | cancer |            |                       |
| Pparg    | cancer |            |                       |
| Ppfibp1  | cancer |            |                       |
| Ppm1d    |        | cell cycle |                       |
| Ppm1g    |        | cell cycle |                       |
| Ppp1ca   |        | cell cycle |                       |
| Ppp1cb   |        | cell cycle |                       |
| Ppp1r12a |        | cell cycle |                       |
| Ppp1r13b |        | cell cycle |                       |
| Ppp1r1c  |        | cell cycle |                       |
| Ppp2ca   |        | cell cycle |                       |
| Ppp2r1a  | cancer | cell cycle |                       |
| Ppp2r2a  |        | cell cycle |                       |
| Ppp2r2b  |        | cell cycle |                       |
| Ppp2r2c  |        | cell cycle |                       |
| Ppp2r2d  |        | cell cycle |                       |
| Ppp2r3d  |        | cell cycle |                       |
| Ppp2r4   |        | cell cycle |                       |
| Ppp2r5b  |        | cell cycle |                       |
| Ppp3ca   |        | cell cycle |                       |
| Ppp4c    |        |            | DNA repair            |
| Ppp4r2   |        |            | DNA repair            |
| Ppp6c    | cancer | cell cycle |                       |
| Prc1     |        | cell cycle |                       |
| Prcc     | cancer | cell cycle |                       |
| Prdm1    | cancer |            |                       |
| Prdm16   | cancer |            |                       |
| Prdm5    |        | cell cycle |                       |
| Prdm9    |        | cell cycle |                       |
| Prf1     | cancer |            |                       |
| Primpol  |        |            | DNA repair            |

|           |        |            |            |
|-----------|--------|------------|------------|
| Prkaca    | cancer | cell cycle |            |
| Prkacb    |        | cell cycle |            |
| Prkar1a   | cancer |            |            |
| Prkca     |        | cell cycle |            |
| Prkcd     |        | cell cycle |            |
| Prkce     |        | cell cycle |            |
| Prkcg     |        |            | DNA repair |
| Prkcq     |        | cell cycle |            |
| Prkdc     |        | cell cycle | DNA repair |
| Prmt2     |        | cell cycle |            |
| Prmt6     |        |            | DNA repair |
| Prox1     |        | cell cycle |            |
| Prpf19    |        | cell cycle | DNA repair |
| Prpf40a   |        | cell cycle |            |
| Prr11     |        | cell cycle |            |
| Prr5      |        | cell cycle |            |
| Prrx1     | cancer |            |            |
| Psip1     | cancer |            |            |
| Psmc3ip   |        | cell cycle |            |
| Psmd10    |        | cell cycle |            |
| Psmd13    |        | cell cycle |            |
| Psmd14    |        |            | DNA repair |
| Psme1     |        | cell cycle |            |
| Psme2     |        | cell cycle |            |
| Psme3     |        | cell cycle |            |
| Psme4     |        |            | DNA repair |
| Psmg2     |        | cell cycle |            |
| Psrc1     |        | cell cycle |            |
| Pstpip1   |        | cell cycle |            |
| Ptch1     | cancer | cell cycle |            |
| Pten      | cancer | cell cycle |            |
| Ptgs2     |        | cell cycle |            |
| Ptk6      | cancer |            |            |
| Ptp4a1    |        | cell cycle |            |
| Ptpn11    | cancer | cell cycle |            |
| Ptpn13    | cancer |            |            |
| Ptpn3     |        | cell cycle |            |
| Ptpn6     |        | cell cycle |            |
| Ptprb     | cancer |            |            |
| Ptprc     | cancer | cell cycle |            |
| Ptprk     | cancer | cell cycle |            |
| Ptprv     |        | cell cycle |            |
| Pttg1     |        | cell cycle | DNA repair |
| Pum1      |        | cell cycle |            |
| Pura      |        | cell cycle |            |
| Pwwwp2a   | cancer |            |            |
| Rab11a    |        | cell cycle |            |
| Rab11fip3 |        | cell cycle |            |

|           |        |            |            |
|-----------|--------|------------|------------|
| Rab11fip4 |        | cell cycle |            |
| Rab35     |        | cell cycle |            |
| Rabep1    | cancer |            |            |
| Rabgap1   |        | cell cycle |            |
| Rac1      | cancer |            |            |
| Racgap1   |        | cell cycle |            |
| Rack1     |        | cell cycle |            |
| Rad1      |        | cell cycle | DNA repair |
| Rad17     |        | cell cycle | DNA repair |
| Rad18     |        |            | DNA repair |
| Rad21     | cancer | cell cycle | DNA repair |
| Rad21l    |        | cell cycle | DNA repair |
| Rad23a    |        |            | DNA repair |
| Rad23b    |        |            | DNA repair |
| Rad50     |        | cell cycle | DNA repair |
| Rad51     |        | cell cycle | DNA repair |
| Rad51ap1  |        |            | DNA repair |
| Rad51b    | cancer | cell cycle | DNA repair |
| Rad51c    |        | cell cycle | DNA repair |
| Rad51d    |        | cell cycle | DNA repair |
| Rad52     |        |            | DNA repair |
| Rad54b    |        |            | DNA repair |
| Rad54l    |        |            | DNA repair |
| Rad9a     |        | cell cycle | DNA repair |
| Rad9b     |        | cell cycle | DNA repair |
| Raf1      | cancer |            |            |
| Rala      |        | cell cycle |            |
| Ralb      |        | cell cycle |            |
| Ralbp1    |        | cell cycle |            |
| Ralgds    | cancer |            |            |
| Ran       |        | cell cycle |            |
| Ranbp1    |        | cell cycle |            |
| Ranbp17   | cancer |            |            |
| Ranbp2    | cancer |            |            |
| Rap1gds1  | cancer |            |            |
| Rara      | cancer | cell cycle |            |
| Rassf1    |        | cell cycle |            |
| Rassf2    |        | cell cycle |            |
| Rassf4    |        | cell cycle |            |
| Rb1       | cancer | cell cycle |            |
| Rb1cc1    |        | cell cycle |            |
| Rbbp4     |        | cell cycle |            |
| Rbbp8     |        | cell cycle | DNA repair |
| Rbl1      |        | cell cycle |            |
| Rbl2      |        | cell cycle |            |
| Rbm10     | cancer |            |            |
| Rbm14     |        | cell cycle |            |
| Rbm15     | cancer |            |            |

|          |        |            |            |
|----------|--------|------------|------------|
| Rbm38    |        | cell cycle |            |
| Rbm7     |        | cell cycle |            |
| Rbx1     |        |            | DNA repair |
| Rcctb1   |        | cell cycle |            |
| Rcc1     |        | cell cycle |            |
| Rcc2     |        | cell cycle |            |
| Rdx      |        | cell cycle |            |
| Rec114   |        | cell cycle |            |
| Rec8     |        | cell cycle | DNA repair |
| Recq1    |        |            | DNA repair |
| Recq14   | cancer | cell cycle | DNA repair |
| Recq15   |        | cell cycle | DNA repair |
| Reep3    |        | cell cycle |            |
| Reep4    |        | cell cycle |            |
| Rel      | cancer |            |            |
| Ret      | cancer |            |            |
| Rev1     |        |            | DNA repair |
| Rev3l    |        |            | DNA repair |
| Rfc1     |        |            | DNA repair |
| Rfwd3    |        | cell cycle | DNA repair |
| Rgcc     |        | cell cycle |            |
| Rgs14    |        | cell cycle |            |
| Rgs2     |        | cell cycle |            |
| Rhno1    |        | cell cycle |            |
| Rhoa     |        | cell cycle |            |
| Rhob     |        | cell cycle |            |
| Rhoc     |        | cell cycle |            |
| Rhoh     | cancer |            |            |
| Rhou     |        | cell cycle |            |
| Rif1     |        | cell cycle | DNA repair |
| Rint1    |        | cell cycle |            |
| Rmi2     | cancer |            |            |
| Rnaseh2a |        |            | DNA repair |
| Rnaseh2b |        | cell cycle |            |
| Rnf112   |        | cell cycle |            |
| Rnf138   |        |            | DNA repair |
| Rnf167   |        | cell cycle |            |
| Rnf168   |        |            | DNA repair |
| Rnf169   |        |            | DNA repair |
| Rnf2     |        | cell cycle |            |
| Rnf212   |        | cell cycle |            |
| Rnf213   | cancer |            |            |
| Rnf4     |        | cell cycle |            |
| Rnf43    | cancer |            |            |
| Rnf8     |        | cell cycle | DNA repair |
| Rny1     |        | cell cycle |            |
| Rny3     |        | cell cycle |            |
| Rock2    |        | cell cycle |            |

|         |        |            |                       |
|---------|--------|------------|-----------------------|
| Rora    |        |            | xenobiotic metabolism |
| Rorc    |        |            | xenobiotic metabolism |
| Ros1    | cancer |            |                       |
| Rpa1    |        | cell cycle | DNA repair            |
| Rpa2    |        | cell cycle | DNA repair            |
| Rpa3    |        | cell cycle | DNA repair            |
| Rpain   |        |            | DNA repair            |
| Rpl17   |        | cell cycle |                       |
| Rpl22   | cancer |            |                       |
| Rpl24   |        | cell cycle |                       |
| Rpl5    | cancer |            |                       |
| Rpn1    | cancer |            |                       |
| Rprd1b  |        | cell cycle |                       |
| Rprm    |        | cell cycle |                       |
| Rps15a  |        | cell cycle |                       |
| Rps27l  |        | cell cycle | DNA repair            |
| Rps3    |        | cell cycle | DNA repair            |
| Rps6    |        | cell cycle |                       |
| Rps6ka2 |        | cell cycle |                       |
| Rps6ka3 |        | cell cycle |                       |
| Rps6kb1 |        | cell cycle |                       |
| Rrm2b   |        |            | DNA repair            |
| Rrp8    |        | cell cycle |                       |
| Rrs1    |        | cell cycle |                       |
| Rsph1   |        | cell cycle |                       |
| Rspo1   |        | cell cycle |                       |
| Rspo2   | cancer |            |                       |
| Rspo3   | cancer |            |                       |
| Rtel1   |        | cell cycle | DNA repair            |
| Rtfdc1  |        | cell cycle |                       |
| Runx1   | cancer |            |                       |
| Runx1t1 | cancer |            |                       |
| Runx3   |        | cell cycle |                       |
| Ruvbl1  |        | cell cycle | DNA repair            |
| Ruvbl2  |        |            | DNA repair            |
| Rxfp3   |        | cell cycle |                       |
| Sac3d1  |        | cell cycle |                       |
| Sae1    |        | cell cycle |                       |
| Sass6   |        | cell cycle |                       |
| Sbds    | cancer | cell cycle |                       |
| Scrib   |        | cell cycle |                       |
| Sdc4    | cancer |            |                       |
| Sdcbp   |        | cell cycle |                       |
| Sdccag3 |        | cell cycle |                       |
| Sdha    | cancer |            |                       |
| Sdhaf2  | cancer |            |                       |
| Sdhb    | cancer |            |                       |
| Sdhc    | cancer |            |                       |

|         |        |            |            |
|---------|--------|------------|------------|
| Seh1    |        | cell cycle |            |
| Senp2   |        | cell cycle |            |
| Senp5   |        | cell cycle |            |
| Senp6   |        | cell cycle |            |
| Sept1   |        | cell cycle |            |
| Sept10  |        | cell cycle |            |
| Sept11  |        | cell cycle |            |
| Sept14  |        | cell cycle |            |
| Sept2   |        | cell cycle |            |
| Sept3   |        | cell cycle |            |
| Sept4   |        | cell cycle |            |
| Sept5   | cancer | cell cycle |            |
| Sept6   |        | cell cycle |            |
| Sept7   |        | cell cycle |            |
| Sept9   | cancer | cell cycle |            |
| Set     | cancer |            |            |
| Setbp1  | cancer |            |            |
| Setd2   | cancer |            | DNA repair |
| Setdb2  |        | cell cycle |            |
| Setx    |        |            | DNA repair |
| Sf3b1   | cancer |            |            |
| Sfn     |        | cell cycle |            |
| Sfpq    | cancer | cell cycle | DNA repair |
| Sfr1    |        |            | DNA repair |
| Sfrp1   |        | cell cycle |            |
| Sgk1    |        | cell cycle |            |
| Sgol1   |        | cell cycle |            |
| Sgol2a  |        | cell cycle |            |
| Sgsm3   |        | cell cycle |            |
| Sh2b1   |        | cell cycle |            |
| Sh2b3   | cancer |            |            |
| Sh3gl1  | cancer |            |            |
| Sh3glb1 |        | cell cycle |            |
| Shb     |        | cell cycle |            |
| Shfm1   |        |            | DNA repair |
| Shprh   |        |            | DNA repair |
| Siah1a  |        | cell cycle |            |
| Siah2   |        | cell cycle |            |
| Sik1    |        | cell cycle |            |
| Sin3a   |        | cell cycle |            |
| Sipa1   |        | cell cycle |            |
| Sirt1   |        | cell cycle | DNA repair |
| Sirt2   |        | cell cycle |            |
| Sirt6   |        |            | DNA repair |
| Sirt7   |        | cell cycle |            |
| Six3    |        | cell cycle |            |
| Ska1    |        | cell cycle |            |
| Ska2    |        | cell cycle |            |



|          |        |            |                       |
|----------|--------|------------|-----------------------|
| Ska3     |        | cell cycle |                       |
| Skil     |        | cell cycle |                       |
| Skp2     |        | cell cycle |                       |
| Slbp     |        | cell cycle |                       |
| Slc25a33 |        | cell cycle |                       |
| Slc26a8  |        | cell cycle |                       |
| Slc34a2  | cancer |            |                       |
| Slc45a3  | cancer |            |                       |
| Slc6a4   |        | cell cycle |                       |
| Slc9a3r1 |        | cell cycle |                       |
| Slco1a6  |        |            | xenobiotic metabolism |
| Slf1     |        | cell cycle | DNA repair            |
| Sln1     |        | cell cycle |                       |
| Slx1b    |        |            | DNA repair            |
| Slx4     |        | cell cycle | DNA repair            |
| Smad2    | cancer |            |                       |
| Smad3    | cancer | cell cycle |                       |
| Smad4    | cancer |            |                       |
| Smarca4  | cancer |            |                       |
| Smarca5  |        |            | DNA repair            |
| Smarcad1 |        | cell cycle | DNA repair            |
| Smarcb1  | cancer | cell cycle | DNA repair            |
| Smarcd1  | cancer |            |                       |
| Smarcd3  |        | cell cycle |                       |
| Smarce1  | cancer |            |                       |
| Smc1a    |        | cell cycle | DNA repair            |
| Smc1b    |        | cell cycle |                       |
| Smc2     |        | cell cycle |                       |
| Smc3     |        | cell cycle | DNA repair            |
| Smc4     |        | cell cycle |                       |
| Smc5     |        | cell cycle | DNA repair            |
| Smc6     |        |            | DNA repair            |
| Smg1     |        |            | DNA repair            |
| Smo      | cancer |            |                       |
| Smpd3    |        | cell cycle |                       |
| Smug1    |        |            | DNA repair            |
| Snd1     | cancer |            |                       |
| Snx18    |        | cell cycle |                       |
| Snx33    |        | cell cycle |                       |
| Snx9     |        | cell cycle |                       |
| Socs1    | cancer |            |                       |
| Son      |        | cell cycle |                       |
| Sox15    |        | cell cycle |                       |
| Sox2     | cancer | cell cycle |                       |
| Sox4     |        | cell cycle |                       |
| Sox9     |        | cell cycle |                       |
| Spag5    |        | cell cycle |                       |
| Spag8    |        | cell cycle |                       |

|         |        |            |            |
|---------|--------|------------|------------|
| Spast   |        | cell cycle |            |
| Spata22 |        | cell cycle | DNA repair |
| Spc24   |        | cell cycle |            |
| Spc25   |        | cell cycle |            |
| Spdl1   |        | cell cycle |            |
| Spdya   |        | cell cycle |            |
| Spdye4a |        | cell cycle |            |
| Specc1  | cancer |            |            |
| Specc1l |        | cell cycle |            |
| Spen    | cancer |            |            |
| Spg20   |        | cell cycle |            |
| Sphk1   |        | cell cycle |            |
| Spice1  |        | cell cycle |            |
| Spidr   |        |            | DNA repair |
| Spin1   |        | cell cycle |            |
| Spin2c  |        | cell cycle |            |
| Spire1  |        | cell cycle |            |
| Spire2  |        | cell cycle |            |
| Spo11   |        | cell cycle |            |
| Spop    | cancer |            |            |
| Sprtn   |        |            | DNA repair |
| Spry1   |        | cell cycle |            |
| Spry2   |        | cell cycle |            |
| Sptbn1  |        | cell cycle |            |
| Src     |        | cell cycle |            |
| Srgap3  | cancer |            |            |
| Srpk2   |        | cell cycle |            |
| Srsf2   | cancer |            |            |
| Srsf3   | cancer |            |            |
| Ss18    | cancer |            |            |
| Ss18l1  | cancer |            |            |
| Ssrp1   |        |            | DNA repair |
| Sstr5   |        | cell cycle |            |
| Ssx9    | cancer |            |            |
| Ssxa1   | cancer |            |            |
| Ssxb1   | cancer |            |            |
| Ssxb10  | cancer |            |            |
| Ssxb2   | cancer |            |            |
| Ssxb3   | cancer |            |            |
| Ssxb5   | cancer |            |            |
| Ssxb6   | cancer |            |            |
| Ssxb8   | cancer |            |            |
| Ssxb9   | cancer |            |            |
| Stag1   |        | cell cycle |            |
| Stag2   | cancer | cell cycle |            |
| Stag3   |        | cell cycle |            |
| Stamp   |        | cell cycle |            |
| Stard13 |        | cell cycle |            |

|         |        |            |                       |
|---------|--------|------------|-----------------------|
| Stard9  |        | cell cycle |                       |
| Stat3   | cancer | cell cycle |                       |
| Stat5a  |        | cell cycle |                       |
| Stat5b  | cancer | cell cycle |                       |
| Stat6   | cancer |            |                       |
| Steap3  |        | cell cycle |                       |
| Stil    | cancer | cell cycle |                       |
| Stk10   |        | cell cycle |                       |
| Stk11   | cancer | cell cycle |                       |
| Stk24   |        | cell cycle |                       |
| Stk26   |        | cell cycle |                       |
| Stmn1   |        | cell cycle |                       |
| Stox1   |        | cell cycle |                       |
| Stra13  |        | cell cycle | DNA repair            |
| Stra8   |        | cell cycle |                       |
| Strada  |        | cell cycle |                       |
| Stradb  |        | cell cycle |                       |
| Strn    | cancer |            |                       |
| Stub1   |        |            | DNA repair            |
| Stxbp4  |        | cell cycle |                       |
| Sufu    | cancer |            |                       |
| Sult1a1 |        |            | xenobiotic metabolism |
| Sult1b1 |        |            | xenobiotic metabolism |
| Sun1    |        | cell cycle |                       |
| Supt16  |        |            | DNA repair            |
| Susd2   |        | cell cycle |                       |
| Suv39h1 |        | cell cycle |                       |
| Suv39h2 |        | cell cycle |                       |
| Suz12   | cancer |            |                       |
| Swi5    |        |            | DNA repair            |
| Swsap1  |        |            | DNA repair            |
| Syce1   |        | cell cycle |                       |
| Syce1l  |        | cell cycle |                       |
| Syce2   |        | cell cycle |                       |
| Syce3   |        | cell cycle |                       |
| Sycp1   |        | cell cycle | DNA repair            |
| Sycp2   |        | cell cycle |                       |
| Sycp3   |        | cell cycle | DNA repair            |
| Syde1   |        | cell cycle |                       |
| Syf2    |        | cell cycle |                       |
| Syk     | cancer |            |                       |
| Syne4   |        | cell cycle |                       |
| Tacc1   |        | cell cycle |                       |
| Tacc2   |        | cell cycle |                       |
| Tacc3   |        | cell cycle |                       |
| Tada2a  |        | cell cycle |                       |
| Tada3   |        | cell cycle |                       |
| Taf1    |        | cell cycle |                       |

|          |        |            |            |
|----------|--------|------------|------------|
| Taf10    |        | cell cycle |            |
| Taf15    | cancer |            |            |
| Taf2     |        | cell cycle |            |
| Taf6     |        | cell cycle |            |
| Tal1     | cancer | cell cycle |            |
| Tal2     | cancer |            |            |
| Taok1    |        | cell cycle | DNA repair |
| Taok2    |        | cell cycle |            |
| Taok3    |        | cell cycle | DNA repair |
| Tardbp   |        | cell cycle |            |
| Tas1r2   |        | cell cycle |            |
| Tas2r121 |        | cell cycle |            |
| Tbl1xr1  | cancer |            |            |
| Tbrg1    |        | cell cycle |            |
| Tbx3     | cancer | cell cycle |            |
| Tcea1    | cancer |            |            |
| Tcf12    | cancer |            |            |
| Tcf19    |        | cell cycle |            |
| Tcf3     | cancer |            |            |
| Tcf7l1   |        | cell cycle |            |
| Tcf7l2   | cancer | cell cycle |            |
| Tcl1     | cancer |            |            |
| Tdg      |        |            | DNA repair |
| Tdp1     |        |            | DNA repair |
| Tdp2     |        |            | DNA repair |
| Tdpoz1   | cancer |            |            |
| Tdpoz2   | cancer |            |            |
| Tdpoz3   | cancer |            |            |
| Tdpoz4   | cancer |            |            |
| Tdpoz5   | cancer |            |            |
| Tdrd1    |        | cell cycle |            |
| Tdrd12   |        | cell cycle |            |
| Tdrd9    |        | cell cycle |            |
| Tdrkh    |        | cell cycle |            |
| Terf1    |        | cell cycle |            |
| Terf2    |        | cell cycle |            |
| Terf2ip  |        |            | DNA repair |
| Tert     | cancer | cell cycle |            |
| Tet1     | cancer |            |            |
| Tet2     | cancer | cell cycle |            |
| Tex11    |        | cell cycle |            |
| Tex12    |        | cell cycle | DNA repair |
| Tex14    |        | cell cycle |            |
| Tex15    |        | cell cycle | DNA repair |
| Tex19.1  |        | cell cycle |            |
| Tex19.2  |        | cell cycle |            |
| Tex24    |        | cell cycle |            |
| Tex40    |        | cell cycle |            |

|           |        |            |            |
|-----------|--------|------------|------------|
| Tfap4     |        | cell cycle |            |
| Tfdp1     |        | cell cycle |            |
| Tfdp2     |        | cell cycle |            |
| Tfe3      | cancer |            |            |
| Tfeb      | cancer |            |            |
| Tfg       | cancer |            |            |
| Tfpt      | cancer |            | DNA repair |
| Tfrc      | cancer |            |            |
| Tgfa      |        | cell cycle |            |
| Tgfb1     |        | cell cycle |            |
| Tgfb2     |        | cell cycle |            |
| Tgfbr2    | cancer |            |            |
| Tgm1      |        | cell cycle |            |
| Thap1     |        | cell cycle |            |
| Thbs1     |        | cell cycle |            |
| Thoc1     |        | cell cycle |            |
| Thoc5     |        | cell cycle |            |
| Thrap3    | cancer |            |            |
| Ticrr     |        | cell cycle | DNA repair |
| Tigar     |        |            | DNA repair |
| Timeless  |        | cell cycle |            |
| Timp2     |        | cell cycle |            |
| Tipin     |        | cell cycle |            |
| Tiprl     |        | cell cycle |            |
| Tjp3      |        | cell cycle |            |
| Tlk1      |        | cell cycle |            |
| Tlk2      |        | cell cycle |            |
| Tlx1      | cancer |            |            |
| Tlx3      | cancer |            |            |
| Tmem161a  |        |            | DNA repair |
| Tmem67    |        | cell cycle |            |
| Tmod3     |        | cell cycle |            |
| Tmprss11a |        | cell cycle |            |
| Tmprss2   | cancer |            |            |
| Tnf       |        | cell cycle |            |
| Tnfaip3   | cancer | cell cycle |            |
| Tnfrsf14  | cancer |            |            |
| Tnfrsf17  | cancer |            |            |
| Tnks      |        | cell cycle |            |
| Tom1l1    |        | cell cycle |            |
| Tom1l2    |        | cell cycle |            |
| Tonsl     |        |            | DNA repair |
| Top1      | cancer |            |            |
| Top2a     |        | cell cycle |            |
| Top2b     |        | cell cycle |            |
| Topaz1    |        | cell cycle |            |
| Topbp1    |        | cell cycle | DNA repair |
| Tpd52l1   |        | cell cycle |            |

|           |        |            |            |
|-----------|--------|------------|------------|
| Tpm4      | cancer |            |            |
| Tpr       | cancer | cell cycle |            |
| Tpra1     |        | cell cycle |            |
| Tpx2      |        | cell cycle |            |
| Traf7     | cancer |            |            |
| Trex2     |        |            | DNA repair |
| Trim21    |        | cell cycle |            |
| Trim24    | cancer |            |            |
| Trim27    | cancer |            |            |
| Trim28    |        |            | DNA repair |
| Trim32    |        | cell cycle |            |
| Trim33    | cancer |            |            |
| Trim35    |        | cell cycle |            |
| Trim36    |        | cell cycle |            |
| Trim37    |        | cell cycle |            |
| Trim71    |        | cell cycle |            |
| Triobp    |        | cell cycle |            |
| Trip11    | cancer |            |            |
| Trip12    |        |            | DNA repair |
| Trip13    |        | cell cycle | DNA repair |
| Trnp1     |        | cell cycle |            |
| Trp53     | cancer | cell cycle | DNA repair |
| Trp53bp1  |        | cell cycle | DNA repair |
| Trp53bp2  |        | cell cycle |            |
| Trp53inp1 |        | cell cycle |            |
| Trp63     |        | cell cycle |            |
| Trp73     |        | cell cycle |            |
| Trpc2     |        |            | DNA repair |
| Trrap     | cancer | cell cycle | DNA repair |
| Tsc1      | cancer | cell cycle |            |
| Tsc2      | cancer | cell cycle |            |
| Tsg101    |        | cell cycle |            |
| Tshr      | cancer |            |            |
| Tspyl2    |        | cell cycle |            |
| Ttc28     |        | cell cycle |            |
| Ttc5      |        |            | DNA repair |
| Ttk       |        | cell cycle |            |
| Ttl       | cancer |            |            |
| Ttyh1     |        | cell cycle |            |
| Tubb1     |        | cell cycle |            |
| Tubb3     |        | cell cycle |            |
| Tubb5     |        | cell cycle |            |
| Tubg1     |        | cell cycle |            |
| Tubgcp2   |        | cell cycle |            |
| Tubgcp3   |        | cell cycle |            |
| Tubgcp4   |        | cell cycle |            |
| Tubgcp5   |        | cell cycle |            |
| Tubgcp6   |        | cell cycle |            |

|         |        |            |                       |
|---------|--------|------------|-----------------------|
| Tunar   |        | cell cycle |                       |
| Twist1  |        |            | DNA repair            |
| Txlng   |        | cell cycle |                       |
| Txnip   |        | cell cycle |                       |
| Txn14b  |        | cell cycle |                       |
| U2af1   | cancer |            |                       |
| Uba3    |        | cell cycle |                       |
| Ubb     |        | cell cycle |                       |
| Ube2a   |        |            | DNA repair            |
| Ube2b   |        | cell cycle | DNA repair            |
| Ube2c   |        | cell cycle |                       |
| Ube2d3  |        |            | DNA repair            |
| Ube2e2  |        | cell cycle |                       |
| Ube2f   |        |            | DNA repair            |
| Ube2i   |        | cell cycle |                       |
| Ube2l3  |        | cell cycle |                       |
| Ube2n   |        |            | DNA repair            |
| Ube2s   |        | cell cycle |                       |
| Ube2t   |        |            | DNA repair            |
| Ube2u   |        |            | DNA repair            |
| Ube2v1  |        |            | DNA repair            |
| Ube2v2  |        |            | DNA repair            |
| Ube2w   |        |            | DNA repair            |
| Ubr2    |        | cell cycle |                       |
| Ubr5    | cancer |            | DNA repair            |
| Uchl5   |        |            | DNA repair            |
| Uck1    |        | cell cycle |                       |
| Ugt1a1  |        |            | xenobiotic metabolism |
| Ugt1a10 |        |            | xenobiotic metabolism |
| Ugt1a2  |        |            | xenobiotic metabolism |
| Ugt1a5  |        |            | xenobiotic metabolism |
| Ugt1a6a |        |            | xenobiotic metabolism |
| Ugt1a6b |        |            | xenobiotic metabolism |
| Ugt1a7c |        |            | xenobiotic metabolism |
| Ugt1a8  |        |            | xenobiotic metabolism |
| Ugt1a9  |        |            | xenobiotic metabolism |
| Ugt2b1  |        |            | xenobiotic metabolism |
| Uhmk1   |        | cell cycle |                       |
| Uhrf1   |        | cell cycle | DNA repair            |
| Uhrf2   |        | cell cycle |                       |
| Uimc1   |        | cell cycle | DNA repair            |
| Ung     |        |            | DNA repair            |
| Upf1    |        | cell cycle | DNA repair            |
| Urgcp   |        | cell cycle |                       |
| Ush1c   |        | cell cycle |                       |
| Usp1    |        |            | DNA repair            |
| Usp10   |        |            | DNA repair            |
| Usp16   |        | cell cycle |                       |

|         |        |            |            |
|---------|--------|------------|------------|
| Usp19   |        | cell cycle |            |
| Usp2    |        | cell cycle |            |
| Usp22   |        | cell cycle |            |
| Usp28   |        | cell cycle | DNA repair |
| Usp3    |        | cell cycle | DNA repair |
| Usp32   | cancer |            |            |
| Usp33   |        | cell cycle |            |
| Usp37   |        | cell cycle |            |
| Usp39   |        | cell cycle |            |
| Usp44   |        | cell cycle |            |
| Usp45   |        |            | DNA repair |
| Usp47   |        | cell cycle | DNA repair |
| Usp7    |        |            | DNA repair |
| Usp8    | cancer | cell cycle |            |
| Usp9x   |        | cell cycle |            |
| Utp14b  |        | cell cycle |            |
| Uvrag   |        | cell cycle | DNA repair |
| Uvssa   |        |            | DNA repair |
| Vash1   |        | cell cycle |            |
| Vcp     |        |            | DNA repair |
| Vcpip1  |        | cell cycle |            |
| Vps4a   |        | cell cycle |            |
| Vps4b   |        | cell cycle |            |
| Vrk1    |        | cell cycle |            |
| Vti1a   | cancer |            |            |
| Wac     |        | cell cycle |            |
| Wapl    |        | cell cycle |            |
| Was     | cancer |            |            |
| Wash1   |        | cell cycle |            |
| Wasl    |        | cell cycle |            |
| Wdr43   |        | cell cycle |            |
| Wdr48   |        |            | DNA repair |
| Wdr6    |        | cell cycle |            |
| Wdr62   |        | cell cycle |            |
| Wdr76   |        | cell cycle |            |
| Wdr81   |        | cell cycle |            |
| Wee1    |        | cell cycle |            |
| Wee2    |        | cell cycle |            |
| Wfs1    |        | cell cycle |            |
| Whsc1   | cancer |            | DNA repair |
| Whsc1l1 | cancer |            |            |
| Wif1    | cancer |            |            |
| Wiz     |        | cell cycle |            |
| Wnt10b  |        | cell cycle |            |
| Wnt4    |        | cell cycle |            |
| Wnt5a   |        | cell cycle |            |
| Wnt9a   |        | cell cycle |            |
| Wrap73  |        | cell cycle |            |



|         |        |            |            |
|---------|--------|------------|------------|
| Wrn     | cancer |            | DNA repair |
| Wrnip1  |        |            | DNA repair |
| Wt1     | cancer |            |            |
| Wtap    |        | cell cycle |            |
| Wwtr1   | cancer |            |            |
| Xab2    |        |            | DNA repair |
| Xpa     | cancer |            | DNA repair |
| Xpc     | cancer | cell cycle | DNA repair |
| Xpo1    | cancer | cell cycle |            |
| Xrcc1   |        |            | DNA repair |
| Xrcc2   |        | cell cycle | DNA repair |
| Xrcc3   |        | cell cycle | DNA repair |
| Xrcc4   |        |            | DNA repair |
| Xrcc5   |        |            | DNA repair |
| Xrcc6   |        |            | DNA repair |
| Xrn1    |        | cell cycle |            |
| Xrn2    |        |            | DNA repair |
| Ywhae   | cancer |            |            |
| Ywhah   |        | cell cycle |            |
| Yy1     |        |            | DNA repair |
| Zak     |        | cell cycle |            |
| Zbtb1   |        |            | DNA repair |
| Zbtb16  | cancer |            |            |
| Zbtb49  |        | cell cycle |            |
| Zc3hc1  |        | cell cycle |            |
| Zcchc8  | cancer |            |            |
| Zfhx3   | cancer |            |            |
| Zfp207  |        | cell cycle |            |
| Zfp318  |        | cell cycle |            |
| Zfp365  |        | cell cycle |            |
| Zfp369  |        | cell cycle |            |
| Zfp384  | cancer |            |            |
| Zfp385a |        | cell cycle |            |
| Zfp386  |        | cell cycle |            |
| Zfp503  |        | cell cycle |            |
| Zfp521  | cancer |            |            |
| Zfp655  |        | cell cycle |            |
| Zfp703  |        | cell cycle |            |
| Zfp830  |        | cell cycle |            |
| Zfyve19 |        | cell cycle |            |
| Zfyve26 |        | cell cycle | DNA repair |
| Znhit1  |        | cell cycle |            |
| Zpr1    |        | cell cycle |            |
| Zranb3  |        |            | DNA repair |
| Zrsr1   | cancer |            |            |
| Zrsr2   | cancer |            |            |
| Zswim7  |        |            | DNA repair |
| Zw10    |        | cell cycle |            |

|                    |            |             |            |           |
|--------------------|------------|-------------|------------|-----------|
| Zwilch             | cell cycle |             |            |           |
| Zwint              | cell cycle |             |            |           |
| <b>Grand Total</b> | <b>641</b> | <b>1432</b> | <b>407</b> | <b>45</b> |

**Supplemental Table S3.** CNVs called by aCGH and comparison to CNVnator (NGS coverage-based algorithm) calls.

| chromosome | start of R-gada CNV call (mm10 coordinates) | end of R-gada CNV call (mm10 coordinates) | size    | name  | # CNVs called by CNVnator in region | CNV Classification Type |
|------------|---------------------------------------------|-------------------------------------------|---------|-------|-------------------------------------|-------------------------|
| chr1       | 8,977,823                                   | 9,051,197                                 | 73,374  | CNV1  | 1                                   | Simple                  |
| chr1       | 11,245,663                                  | 11,269,836                                | 24,173  | CNV2  | 1                                   | Simple                  |
| chr1       | 11,703,347                                  | 11,918,632                                | 215,285 | CNV3  | 10                                  | Complex                 |
| chr1       | 11,924,866                                  | 11,931,700                                | 6,834   | CNV4  | 1                                   | Simple                  |
| chr1       | 14,883,606                                  | 14,896,597                                | 12,991  | CNV5  | 1                                   | Simple                  |
| chr1       | 20,335,207                                  | 20,374,697                                | 39,490  | CNV6  | 0                                   | Simple                  |
| chr1       | 20,504,760                                  | 20,562,015                                | 57,255  | CNV7  | 1                                   | Simple                  |
| chr1       | 29,112,070                                  | 29,148,585                                | 36,515  | CNV8  | 2                                   | Complex                 |
| chr1       | 48,675,149                                  | 48,707,315                                | 32,166  | CNV9  | 5                                   | Complex                 |
| chr1       | 59,814,900                                  | 59,821,568                                | 6,668   | CNV10 | 1                                   | Simple                  |
| chr1       | 61,744,707                                  | 61,752,097                                | 7,390   | CNV11 | 1                                   | Simple                  |
| chr1       | 68,199,570                                  | 68,250,365                                | 50,795  | CNV12 | 1                                   | Simple                  |
| chr1       | 88,209,053                                  | 88,317,518                                | 108,465 | CNV13 | 2                                   | Complex                 |
| chr1       | 115,903,193                                 | 115,913,905                               | 10,712  | CNV14 | 0                                   | Simple                  |
| chr1       | 116,332,959                                 | 116,350,366                               | 17,407  | CNV15 | 1                                   | Simple                  |
| chr1       | 164,025,139                                 | 164,058,471                               | 33,332  | CNV16 | 2                                   | Complex                 |

|      |             |             |         |       |    |         |
|------|-------------|-------------|---------|-------|----|---------|
| chr1 | 171,504,889 | 171,575,973 | 71,084  | CNV17 | 4  | Complex |
| chr1 | 184,979,019 | 185,396,837 | 417,818 | CNV18 | 4  | Complex |
| chr2 | 24,935,959  | 24,981,137  | 45,178  | CNV19 | 0  | Simple  |
| chr2 | 31,192,773  | 31,203,334  | 10,561  | CNV20 | 1  | Simple  |
| chr2 | 41,028,946  | 41,038,306  | 9,360   | CNV21 | 0  | Simple  |
| chr2 | 46,371,360  | 46,548,734  | 177,374 | CNV22 | 1  | Simple  |
| chr2 | 50,849,618  | 50,908,707  | 59,089  | CNV23 | 0  | Simple  |
| chr2 | 51,607,290  | 52,204,431  | 597,141 | CNV24 | 15 | Complex |
| chr2 | 83,816,806  | 83,905,314  | 88,508  | CNV25 | 7  | Complex |
| chr2 | 85,815,643  | 85,821,297  | 5,654   | CNV26 | 0  | Simple  |
| chr2 | 85,901,465  | 85,909,798  | 8,333   | CNV27 | 1  | Simple  |
| chr2 | 86,132,070  | 86,144,930  | 12,860  | CNV28 | 1  | Simple  |
| chr2 | 86,385,227  | 86,512,531  | 127,304 | CNV29 | 6  | Complex |
| chr2 | 87,072,607  | 87,110,411  | 37,804  | CNV30 | 0  | Simple  |
| chr2 | 87,402,071  | 87,417,831  | 15,760  | CNV31 | 3  | Complex |
| chr2 | 88,395,883  | 88,402,255  | 6,372   | CNV32 | 0  | Simple  |
| chr2 | 88,866,285  | 88,893,657  | 27,372  | CNV33 | 0  | Simple  |
| chr2 | 121,474,126 | 121,490,316 | 16,190  | CNV34 | 1  | Simple  |
| chr2 | 128,606,503 | 128,999,857 | 393,354 | CNV35 | 7  | Complex |

|      |             |             |         |       |    |         |
|------|-------------|-------------|---------|-------|----|---------|
| chr2 | 129,206,701 | 129,225,065 | 18,364  | CNV36 | 0  | Simple  |
| chr2 | 139,907,500 | 139,918,156 | 10,656  | CNV37 | 4  | Complex |
| chr2 | 141,845,357 | 141,877,747 | 32,390  | CNV38 | 1  | Simple  |
| chr2 | 143,691,607 | 143,707,446 | 15,839  | CNV39 | 1  | Simple  |
| chr2 | 146,018,411 | 146,198,098 | 179,687 | CNV40 | 12 | Complex |
| chr2 | 146,967,957 | 146,977,748 | 9,791   | CNV41 | 0  | Simple  |
| chr2 | 147,655,650 | 147,706,977 | 51,327  | CNV42 | 3  | Complex |
| chr2 | 149,030,281 | 149,078,332 | 48,051  | CNV43 | 3  | Complex |
| chr2 | 153,807,199 | 154,018,882 | 211,683 | CNV44 | 6  | Complex |
| chr2 | 154,119,082 | 154,680,452 | 561,370 | CNV45 | 10 | Complex |
| chr2 | 156,917,407 | 156,936,288 | 18,881  | CNV46 | 0  | Simple  |
| chr2 | 161,710,942 | 162,231,116 | 520,174 | CNV47 | 18 | Complex |
| chr3 | 7,492,129   | 7,538,999   | 46,870  | CNV48 | 0  | Simple  |
| chr3 | 25,051,626  | 25,064,316  | 12,690  | CNV50 | 0  | Simple  |
| chr3 | 37,972,568  | 38,435,326  | 462,758 | CNV51 | 4  | Complex |
| chr3 | 47,958,634  | 48,014,515  | 55,881  | CNV52 | 9  | Complex |
| chr3 | 49,355,885  | 49,456,870  | 100,985 | CNV53 | 8  | Complex |
| chr3 | 70,661,260  | 70,750,573  | 89,313  | CNV54 | 14 | Complex |
| chr3 | 72,888,214  | 72,899,900  | 11,686  | CNV55 | 1  | Simple  |

|      |             |             |         |       |    |         |
|------|-------------|-------------|---------|-------|----|---------|
| chr3 | 76,250,459  | 76,263,597  | 13,138  | CNV56 | 0  | Simple  |
| chr3 | 79,042,658  | 79,057,176  | 14,518  | CNV57 | 0  | Simple  |
| chr3 | 79,211,728  | 79,230,700  | 18,972  | CNV58 | 0  | Simple  |
| chr3 | 81,108,183  | 81,124,245  | 16,062  | CNV59 | 1  | Simple  |
| chr3 | 81,186,730  | 81,195,719  | 8,989   | CNV60 | 0  | Simple  |
| chr3 | 82,522,808  | 82,537,867  | 15,059  | CNV61 | 1  | Simple  |
| chr3 | 87,127,659  | 87,527,598  | 399,939 | CNV62 | 10 | Complex |
| chr3 | 88,778,677  | 88,827,583  | 48,906  | CNV63 | 10 | Complex |
| chr3 | 94,665,658  | 94,696,424  | 30,766  | CNV64 | 4  | Complex |
| chr3 | 105,846,749 | 105,854,282 | 7,533   | CNV65 | 0  | Simple  |
| chr3 | 106,123,095 | 106,307,629 | 184,534 | CNV66 | 1  | Simple  |
| chr3 | 114,089,044 | 114,101,617 | 12,573  | CNV67 | 0  | Simple  |
| chr3 | 114,675,965 | 114,766,505 | 90,540  | CNV68 | 6  | Complex |
| chr3 | 122,216,034 | 122,236,949 | 20,915  | CNV69 | 1  | Simple  |
| chr3 | 138,566,672 | 138,582,993 | 16,321  | CNV70 | 0  | Simple  |
| chr3 | 139,839,170 | 139,878,648 | 39,478  | CNV71 | 0  | Simple  |
| chr4 | 19,986,101  | 20,084,711  | 98,610  | CNV72 | 2  | Complex |
| chr4 | 31,955,346  | 32,057,183  | 101,837 | CNV73 | 8  | Complex |
| chr4 | 32,001,415  | 32,108,282  | 106,867 | CNV74 | 7  | Complex |

|      |             |             |         |       |    |         |
|------|-------------|-------------|---------|-------|----|---------|
| chr4 | 43,370,151  | 43,430,529  | 60,378  | CNV75 | 0  | Simple  |
| chr4 | 52,947,219  | 52,965,064  | 17,845  | CNV76 | 0  | Simple  |
| chr4 | 62,495,468  | 62,524,243  | 28,775  | CNV77 | 1  | Simple  |
| chr4 | 74,031,944  | 74,037,090  | 5,146   | CNV78 | 0  | Simple  |
| chr4 | 74,217,665  | 74,227,718  | 10,053  | CNV79 | 1  | Simple  |
| chr4 | 75,990,614  | 76,337,386  | 346,772 | CNV80 | 5  | Complex |
| chr4 | 76,340,333  | 76,354,046  | 13,713  | CNV81 | 3  | Complex |
| chr4 | 76,355,918  | 76,584,514  | 228,596 | CNV82 | 2  | Complex |
| chr4 | 111,922,201 | 112,608,339 | 686,138 | CNV83 | 43 | Complex |
| chr4 | 111,952,594 | 112,780,093 | 827,499 | CNV84 | 56 | Complex |
| chr4 | 112,047,785 | 112,780,093 | 732,308 | CNV85 | 45 | Complex |
| chr4 | 112,066,910 | 112,780,093 | 713,183 | CNV86 | 41 | Complex |
| chr4 | 112,350,431 | 112,780,093 | 429,662 | CNV87 | 29 | Complex |
| chr4 | 112,559,367 | 113,113,016 | 553,649 | CNV88 | 48 | Complex |
| chr4 | 112,779,050 | 113,113,016 | 333,966 | CNV89 | 26 | Complex |
| chr4 | 113,918,068 | 114,199,039 | 280,971 | CNV90 | 69 | Complex |
| chr4 | 118,098,652 | 118,109,631 | 10,979  | CNV91 | 0  | Simple  |
| chr4 | 118,585,173 | 118,605,722 | 20,549  | CNV92 | 2  | Complex |
| chr4 | 133,155,079 | 133,164,522 | 9,443   | CNV94 | 0  | Simple  |

|      |             |             |         |        |    |         |
|------|-------------|-------------|---------|--------|----|---------|
| chr4 | 133,930,003 | 133,955,533 | 25,530  | CNV95  | 2  | Complex |
| chr4 | 135,649,234 | 135,671,995 | 22,761  | CNV96  | 2  | Complex |
| chr4 | 136,057,736 | 136,074,376 | 16,640  | CNV97  | 2  | Complex |
| chr4 | 141,392,413 | 141,440,480 | 48,067  | CNV98  | 0  | Simple  |
| chr4 | 143,289,486 | 143,310,088 | 20,602  | CNV99  | 0  | Simple  |
| chr4 | 143,666,881 | 143,842,436 | 175,555 | CNV100 | 30 | Complex |
| chr4 | 143,669,107 | 143,855,451 | 186,344 | CNV101 | 32 | Complex |
| chr4 | 145,432,767 | 145,602,971 | 170,204 | CNV102 | 11 | Complex |
| chr4 | 148,553,835 | 148,562,213 | 8,378   | CNV103 | 0  | Simple  |
| chr4 | 154,187,624 | 154,194,911 | 7,287   | CNV104 | 0  | Simple  |
| chr4 | 154,861,565 | 154,878,580 | 17,015  | CNV105 | 3  | Complex |
| chr5 | 5,109,472   | 5,116,828   | 7,356   | CNV106 | 1  | Simple  |
| chr5 | 6,712,172   | 6,745,203   | 33,031  | CNV107 | 1  | Simple  |
| chr5 | 7,108,520   | 7,155,864   | 47,344  | CNV108 | 5  | Complex |
| chr5 | 13,793,134  | 13,883,147  | 90,013  | CNV109 | 6  | Complex |
| chr5 | 36,010,197  | 36,021,657  | 11,460  | CNV110 | 0  | Simple  |
| chr5 | 37,488,373  | 37,507,515  | 19,142  | CNV111 | 2  | Complex |
| chr5 | 44,054,520  | 44,064,377  | 9,857   | CNV112 | 1  | Simple  |
| chr5 | 48,806,501  | 48,866,367  | 59,866  | CNV113 | 1  | Simple  |



|      |             |             |         |        |    |         |
|------|-------------|-------------|---------|--------|----|---------|
| chr5 | 136,873,132 | 136,880,508 | 7,376   | CNV114 | 0  | Simple  |
| chr5 | 138,206,709 | 138,233,476 | 26,767  | CNV115 | 2  | Complex |
| chr5 | 139,636,398 | 139,649,709 | 13,311  | CNV116 | 0  | Simple  |
| chr6 | 8,091,059   | 8,100,960   | 9,901   | CNV117 | 1  | Simple  |
| chr6 | 10,820,315  | 10,832,439  | 12,124  | CNV118 | 0  | Simple  |
| chr6 | 23,509,757  | 23,520,065  | 10,308  | CNV119 | 5  | Complex |
| chr6 | 71,883,324  | 71,892,732  | 9,408   | CNV120 | 0  | Simple  |
| chr6 | 72,023,690  | 72,040,459  | 16,769  | CNV121 | 3  | Complex |
| chr6 | 106,150,858 | 106,476,074 | 325,216 | CNV122 | 9  | Complex |
| chr6 | 106,479,044 | 106,493,102 | 14,058  | CNV123 | 1  | Simple  |
| chr6 | 109,898,008 | 109,962,591 | 64,583  | CNV124 | 1  | Simple  |
| chr6 | 111,302,147 | 111,323,141 | 20,994  | CNV125 | 0  | Simple  |
| chr6 | 116,485,524 | 116,570,763 | 85,239  | CNV126 | 0  | Simple  |
| chr6 | 125,628,849 | 125,892,585 | 263,736 | CNV127 | 2  | Complex |
| chr6 | 128,633,923 | 128,788,449 | 154,526 | CNV128 | 6  | Complex |
| chr6 | 129,634,754 | 129,842,393 | 207,639 | CNV129 | 10 | Complex |
| chr6 | 129,950,385 | 130,454,449 | 504,064 | CNV130 | 88 | Complex |
| chr6 | 146,129,516 | 146,154,395 | 24,879  | CNV131 | 0  | Simple  |
| chr6 | 146,480,984 | 146,807,421 | 326,437 | CNV132 | 18 | Complex |

|      |             |             |         |        |    |         |
|------|-------------|-------------|---------|--------|----|---------|
| chr7 | 26,568,559  | 26,583,184  | 14,625  | CNV133 | 1  | Simple  |
| chr7 | 29,792,506  | 30,400,746  | 608,240 | CNV134 | 18 | Complex |
| chr7 | 36,903,218  | 37,459,735  | 556,517 | CNV135 | 5  | Complex |
| chr7 | 50,207,340  | 50,222,092  | 14,752  | CNV136 | 0  | Simple  |
| chr7 | 55,061,648  | 55,089,474  | 27,826  | CNV137 | 2  | Complex |
| chr7 | 57,840,731  | 57,849,909  | 9,178   | CNV138 | 1  | Simple  |
| chr7 | 60,049,636  | 60,075,813  | 26,177  | CNV139 | 3  | Complex |
| chr7 | 85,534,611  | 85,563,625  | 29,014  | CNV140 | 1  | Simple  |
| chr7 | 86,682,987  | 86,728,513  | 45,526  | CNV141 | 3  | Complex |
| chr7 | 97,494,251  | 97,502,334  | 8,083   | CNV142 | 0  | Simple  |
| chr7 | 98,153,447  | 98,159,610  | 6,163   | CNV143 | 0  | Simple  |
| chr7 | 99,218,481  | 99,242,434  | 23,953  | CNV144 | 0  | Simple  |
| chr7 | 99,798,476  | 99,802,744  | 4,268   | CNV145 | 1  | Simple  |
| chr7 | 100,682,247 | 100,687,430 | 5,183   | CNV146 | 4  | Complex |
| chr7 | 102,499,902 | 102,521,448 | 21,546  | CNV147 | 0  | Simple  |
| chr7 | 103,543,395 | 103,562,369 | 18,974  | CNV148 | 1  | Simple  |
| chr7 | 103,696,079 | 103,912,126 | 216,047 | CNV149 | 14 | Complex |
| chr7 | 104,281,910 | 104,362,542 | 80,632  | CNV150 | 2  | Complex |
| chr7 | 104,487,277 | 104,548,245 | 60,968  | CNV151 | 10 | Complex |

|      |             |             |         |        |    |         |
|------|-------------|-------------|---------|--------|----|---------|
| chr7 | 106,425,755 | 106,643,080 | 217,325 | CNV152 | 12 | Complex |
| chr7 | 107,105,859 | 107,127,206 | 21,347  | CNV153 | 4  | Complex |
| chr7 | 140,165,697 | 140,816,973 | 651,276 | CNV154 | 30 | Complex |
| chr8 | 16,603,319  | 16,623,922  | 20,603  | CNV155 | 3  | Complex |
| chr8 | 19,370,138  | 19,470,413  | 100,275 | CNV156 | 14 | Complex |
| chr8 | 31,734,588  | 31,798,279  | 63,691  | CNV157 | 2  | Complex |
| chr8 | 33,831,125  | 33,886,267  | 55,142  | CNV158 | 0  | Simple  |
| chr8 | 35,463,754  | 35,470,233  | 6,479   | CNV159 | 0  | Simple  |
| chr8 | 37,819,768  | 37,964,005  | 144,237 | CNV160 | 9  | Complex |
| chr8 | 39,242,017  | 39,254,963  | 12,946  | CNV161 | 2  | Complex |
| chr8 | 58,647,036  | 58,658,911  | 11,875  | CNV162 | 0  | Simple  |
| chr8 | 63,231,258  | 63,295,943  | 64,685  | CNV163 | 2  | Complex |
| chr8 | 63,310,736  | 63,324,409  | 13,673  | CNV164 | 1  | Simple  |
| chr8 | 63,354,746  | 63,363,146  | 8,400   | CNV165 | 0  | Simple  |
| chr8 | 82,049,288  | 82,065,919  | 16,631  | CNV166 | 1  | Simple  |
| chr8 | 83,223,232  | 83,237,972  | 14,740  | CNV167 | 4  | Complex |
| chr8 | 113,718,698 | 113,726,924 | 8,226   | CNV168 | 0  | Simple  |
| chr8 | 113,783,946 | 113,800,505 | 16,559  | CNV169 | 0  | Simple  |
| chr8 | 121,786,998 | 121,795,409 | 8,411   | CNV170 | 0  | Simple  |

|       |             |             |         |        |    |         |
|-------|-------------|-------------|---------|--------|----|---------|
| chr8  | 124,807,261 | 124,821,661 | 14,400  | CNV171 | 3  | Complex |
| chr8  | 125,275,786 | 125,603,762 | 327,976 | CNV172 | 3  | Complex |
| chr8  | 127,164,340 | 127,172,123 | 7,783   | CNV173 | 1  | Simple  |
| chr9  | 38,240,631  | 38,422,124  | 181,493 | CNV174 | 21 | Complex |
| chr9  | 73,771,421  | 73,780,290  | 8,869   | CNV175 | 0  | Simple  |
| chr9  | 80,218,865  | 80,230,523  | 11,658  | CNV176 | 0  | Simple  |
| chr9  | 87,395,340  | 87,415,334  | 19,994  | CNV177 | 1  | Simple  |
| chr9  | 104,460,782 | 105,021,306 | 560,524 | CNV178 | 8  | Complex |
| chr9  | 105,023,496 | 105,033,079 | 9,583   | CNV179 | 0  | Simple  |
| chr10 | 13,199,877  | 13,624,466  | 424,589 | CNV180 | 7  | Complex |
| chr10 | 13,763,949  | 13,776,687  | 12,738  | CNV181 | 0  | Simple  |
| chr10 | 28,625,315  | 29,155,784  | 530,469 | CNV182 | 7  | Complex |
| chr10 | 67,931,697  | 68,074,235  | 142,538 | CNV183 | 1  | Simple  |
| chr10 | 89,889,069  | 89,948,844  | 59,775  | CNV184 | 2  | Complex |
| chr10 | 93,610,851  | 93,623,145  | 12,294  | CNV185 | 3  | Complex |
| chr10 | 93,683,520  | 93,694,187  | 10,667  | CNV186 | 1  | Simple  |
| chr10 | 105,147,044 | 105,672,479 | 525,435 | CNV187 | 7  | Complex |
| chr10 | 106,979,486 | 107,044,304 | 64,818  | CNV188 | 0  | Simple  |
| chr10 | 125,258,632 | 125,357,630 | 98,998  | CNV189 | 0  | Simple  |

|       |             |             |         |        |   |         |
|-------|-------------|-------------|---------|--------|---|---------|
| chr11 | 4,617,196   | 4,625,581   | 8,385   | CNV190 | 0 | Simple  |
| chr11 | 28,406,148  | 28,423,800  | 17,652  | CNV191 | 1 | Simple  |
| chr11 | 29,133,936  | 29,148,705  | 14,769  | CNV192 | 0 | Simple  |
| chr11 | 29,322,325  | 29,362,878  | 40,553  | CNV193 | 3 | Complex |
| chr11 | 51,027,977  | 51,041,483  | 13,506  | CNV194 | 2 | Complex |
| chr11 | 54,814,006  | 54,824,436  | 10,430  | CNV195 | 0 | Simple  |
| chr11 | 58,834,730  | 58,843,551  | 8,821   | CNV196 | 0 | Simple  |
| chr11 | 71,170,125  | 71,296,816  | 126,691 | CNV197 | 7 | Complex |
| chr11 | 74,355,018  | 74,388,327  | 33,309  | CNV198 | 4 | Complex |
| chr11 | 87,834,135  | 87,861,485  | 27,350  | CNV199 | 0 | Simple  |
| chr11 | 89,087,113  | 89,102,010  | 14,897  | CNV200 | 1 | Simple  |
| chr11 | 89,389,901  | 89,398,763  | 8,862   | CNV201 | 0 | Simple  |
| chr11 | 90,010,003  | 90,023,126  | 13,123  | CNV202 | 3 | Complex |
| chr11 | 90,177,799  | 90,258,292  | 80,493  | CNV203 | 3 | Complex |
| chr11 | 99,673,098  | 99,697,296  | 24,198  | CNV204 | 3 | Complex |
| chr11 | 103,509,919 | 103,527,931 | 18,012  | CNV205 | 1 | Simple  |
| chr11 | 114,962,715 | 114,985,929 | 23,214  | CNV206 | 3 | Complex |
| chr11 | 116,742,646 | 116,765,470 | 22,824  | CNV207 | 4 | Complex |
| chr12 | 16,607,032  | 16,629,183  | 22,151  | CNV208 | 0 | Simple  |

|       |             |             |           |        |     |         |
|-------|-------------|-------------|-----------|--------|-----|---------|
| chr12 | 21,192,505  | 21,237,815  | 45,310    | CNV209 | 4   | Complex |
| chr12 | 29,896,600  | 30,176,389  | 279,789   | CNV210 | 3   | Complex |
| chr12 | 35,000,989  | 35,531,721  | 530,732   | CNV211 | 10  | Complex |
| chr12 | 41,298,789  | 41,304,189  | 5,400     | CNV212 | 0   | Simple  |
| chr12 | 61,017,560  | 61,076,252  | 58,692    | CNV213 | 2   | Complex |
| chr12 | 73,294,499  | 73,303,006  | 8,507     | CNV214 | 0   | Simple  |
| chr12 | 100,728,952 | 101,123,906 | 394,954   | CNV215 | 4   | Complex |
| chr12 | 103,710,635 | 103,987,695 | 277,060   | CNV216 | 13  | Complex |
| chr12 | 104,347,614 | 104,358,767 | 11,153    | CNV217 | 1   | Simple  |
| chr12 | 113,437,603 | 113,480,579 | 42,976    | CNV218 | 5   | Complex |
| chr12 | 113,750,353 | 114,382,618 | 632,265   | CNV219 | 72  | Complex |
| chr12 | 113,796,687 | 114,829,882 | 1,033,195 | CNV220 | 131 | Complex |
| chr12 | 114,381,146 | 114,829,882 | 448,736   | CNV221 | 63  | Complex |
| chr12 | 114,384,000 | 115,024,811 | 640,811   | CNV222 | 74  | Complex |
| chr12 | 115,011,988 | 115,058,626 | 46,638    | CNV223 | 4   | Complex |
| chr12 | 115,550,979 | 115,809,134 | 258,155   | CNV224 | 34  | Complex |
| chr12 | 115,847,679 | 115,975,177 | 127,498   | CNV225 | 20  | Complex |
| chr12 | 117,717,294 | 117,722,867 | 5,573     | CNV226 | 0   | Simple  |
| chr13 | 23,402,190  | 23,412,150  | 9,960     | CNV227 | 2   | Complex |

|       |             |             |         |        |    |         |
|-------|-------------|-------------|---------|--------|----|---------|
| chr13 | 67,426,402  | 67,437,626  | 11,224  | CNV228 | 0  | Simple  |
| chr13 | 68,931,593  | 68,941,838  | 10,245  | CNV229 | 2  | Complex |
| chr13 | 95,458,862  | 95,762,089  | 303,227 | CNV230 | 3  | Complex |
| chr13 | 95,763,144  | 95,769,348  | 6,204   | CNV231 | 0  | Simple  |
| chr13 | 95,771,337  | 96,032,280  | 260,943 | CNV232 | 4  | Complex |
| chr13 | 98,598,998  | 98,620,562  | 21,564  | CNV233 | 0  | Simple  |
| chr13 | 116,488,754 | 116,565,169 | 76,415  | CNV234 | 1  | Simple  |
| chr13 | 117,686,179 | 117,934,343 | 248,164 | CNV235 | 4  | Complex |
| chr13 | 119,394,499 | 119,495,445 | 100,946 | CNV236 | 4  | Complex |
| chr14 | 21,212,092  | 21,216,009  | 3,917   | CNV237 | 3  | Complex |
| chr14 | 22,543,520  | 22,567,910  | 24,390  | CNV238 | 0  | Simple  |
| chr14 | 22,903,971  | 22,930,748  | 26,777  | CNV239 | 1  | Simple  |
| chr14 | 49,927,316  | 50,036,074  | 108,758 | CNV240 | 5  | Complex |
| chr14 | 50,962,668  | 50,974,797  | 12,129  | CNV241 | 4  | Complex |
| chr14 | 51,379,141  | 51,954,511  | 575,370 | CNV242 | 43 | Complex |
| chr14 | 51,956,322  | 51,971,989  | 15,667  | CNV243 | 5  | Complex |
| chr14 | 60,697,938  | 60,707,382  | 9,444   | CNV244 | 0  | Simple  |
| chr14 | 69,472,714  | 69,692,315  | 219,601 | CNV245 | 5  | Complex |
| chr14 | 77,231,193  | 77,239,297  | 8,104   | CNV246 | 1  | Simple  |

|       |             |             |         |        |    |         |
|-------|-------------|-------------|---------|--------|----|---------|
| chr14 | 77,240,922  | 77,767,813  | 526,891 | CNV247 | 4  | Complex |
| chr14 | 88,650,421  | 88,702,265  | 51,844  | CNV248 | 7  | Complex |
| chr14 | 90,383,319  | 90,437,558  | 54,239  | CNV249 | 4  | Complex |
| chr14 | 100,516,072 | 100,819,089 | 303,017 | CNV250 | 18 | Complex |
| chr14 | 101,133,530 | 101,159,329 | 25,799  | CNV251 | 1  | Simple  |
| chr14 | 109,315,613 | 109,440,021 | 124,408 | CNV252 | 2  | Complex |
| chr14 | 119,828,821 | 119,835,959 | 7,138   | CNV253 | 5  | Complex |
| chr14 | 121,670,441 | 121,677,892 | 7,451   | CNV254 | 0  | Simple  |
| chr15 | 32,198,496  | 32,490,028  | 291,532 | CNV255 | 9  | Complex |
| chr15 | 39,695,068  | 40,003,295  | 308,227 | CNV256 | 7  | Complex |
| chr15 | 46,930,319  | 46,956,114  | 25,795  | CNV257 | 0  | Simple  |
| chr15 | 47,795,286  | 47,806,194  | 10,908  | CNV258 | 0  | Simple  |
| chr15 | 70,842,485  | 70,889,566  | 47,081  | CNV259 | 10 | Complex |
| chr15 | 78,933,950  | 78,944,254  | 10,304  | CNV260 | 1  | Simple  |
| chr15 | 91,075,146  | 91,135,504  | 60,358  | CNV261 | 8  | Complex |
| chr16 | 28,613,434  | 28,674,852  | 61,418  | CNV262 | 2  | Complex |
| chr16 | 45,235,949  | 45,641,980  | 406,031 | CNV263 | 9  | Complex |
| chr16 | 59,372,305  | 59,763,158  | 390,853 | CNV264 | 7  | Complex |
| chr16 | 62,121,194  | 62,173,208  | 52,014  | CNV265 | 3  | Complex |



|       |            |            |         |        |    |         |
|-------|------------|------------|---------|--------|----|---------|
| chr16 | 64,975,653 | 64,993,703 | 18,050  | CNV266 | 3  | Complex |
| chr16 | 67,881,291 | 67,932,144 | 50,853  | CNV267 | 2  | Complex |
| chr16 | 87,611,354 | 87,624,644 | 13,290  | CNV268 | 0  | Simple  |
| chr16 | 91,002,846 | 91,013,863 | 11,017  | CNV269 | 0  | Simple  |
| chr16 | 93,624,681 | 93,639,559 | 14,878  | CNV270 | 8  | Complex |
| chr17 | 27,248,448 | 27,448,647 | 200,199 | CNV271 | 5  | Complex |
| chr17 | 36,142,310 | 36,227,918 | 85,608  | CNV272 | 20 | Complex |
| chr17 | 36,911,115 | 36,920,990 | 9,875   | CNV273 | 0  | Simple  |
| chr17 | 37,941,852 | 37,953,919 | 12,067  | CNV274 | 1  | Simple  |
| chr17 | 39,945,764 | 40,002,726 | 56,962  | CNV275 | 2  | Complex |
| chr17 | 40,868,431 | 41,085,825 | 217,394 | CNV276 | 16 | Complex |
| chr17 | 55,193,603 | 55,636,845 | 443,242 | CNV277 | 24 | Complex |
| chr17 | 84,910,270 | 84,936,764 | 26,494  | CNV278 | 1  | Simple  |
| chr18 | 12,476,035 | 12,482,423 | 6,388   | CNV279 | 0  | Simple  |
| chr18 | 31,612,672 | 31,637,765 | 25,093  | CNV280 | 3  | Complex |
| chr18 | 32,775,929 | 32,795,858 | 19,929  | CNV281 | 5  | Complex |
| chr18 | 37,324,987 | 37,330,588 | 5,601   | CNV282 | 1  | Simple  |
| chr18 | 43,159,278 | 43,177,946 | 18,668  | CNV283 | 0  | Simple  |
| chr18 | 62,516,177 | 62,525,116 | 8,939   | CNV284 | 0  | Simple  |

|       |             |             |         |        |    |         |
|-------|-------------|-------------|---------|--------|----|---------|
| chr18 | 63,286,953  | 63,294,764  | 7,811   | CNV285 | 0  | Simple  |
| chr18 | 68,121,447  | 68,137,425  | 15,978  | CNV286 | 0  | Simple  |
| chr18 | 70,007,372  | 70,366,675  | 359,303 | CNV287 | 23 | Complex |
| chr18 | 75,532,126  | 76,195,878  | 663,752 | CNV288 | 7  | Complex |
| chr18 | 85,866,855  | 85,906,167  | 39,312  | CNV289 | 7  | Complex |
| chr19 | 9,152,536   | 9,724,688   | 572,152 | CNV290 | 44 | Complex |
| chr19 | 11,559,397  | 11,580,016  | 20,619  | CNV291 | 2  | Complex |
| chr19 | 22,171,199  | 22,181,470  | 10,271  | CNV292 | 1  | Simple  |
| chr19 | 24,109,346  | 24,129,266  | 19,920  | CNV293 | 0  | Simple  |
| chr19 | 36,910,306  | 36,972,609  | 62,303  | CNV294 | 0  | Simple  |
| chr19 | 37,236,210  | 37,378,375  | 142,165 | CNV295 | 1  | Simple  |
| chr19 | 48,377,745  | 48,397,326  | 19,581  | CNV296 | 1  | Simple  |
| chr19 | 50,491,118  | 50,706,252  | 215,134 | CNV297 | 3  | Complex |
| chrX  | 80,532,212  | 80,576,971  | 44,759  | CNV298 | 7  | Complex |
| chrX  | 136,328,010 | 136,366,308 | 38,298  | CNV299 | 3  | Complex |
| chrX  | 158,612,813 | 158,643,816 | 31,003  | CNV300 | 0  | Simple  |

**Supplemental Table S4.** Number of variants detected after downsampling sequence data from Health Canada MutaMouse animals

| <b>Health Canada Mutamouse Animal</b> | <b># Variants in Original Data</b> | <b># Variants in Downsampled Data</b> | <b>Unique Variants in Original Data</b> | <b>Unique Variants in Downsampled Data</b> | <b>Intersection (%)</b> |
|---------------------------------------|------------------------------------|---------------------------------------|-----------------------------------------|--------------------------------------------|-------------------------|
| 1                                     | 4,994,589                          | 4,833,711                             | 369,675                                 | 208,797                                    | 88.88                   |
| 2                                     | 4,961,695                          | 4,725,026                             | 455,428                                 | 218,759                                    | 86.99                   |
| 3                                     | 5,144,580                          | 4,980,247                             | 380,280                                 | 215,947                                    | 88.88                   |
| 4                                     | 4,949,501                          | 4,789,925                             | 367,857                                 | 208,281                                    | 88.83                   |
| 5                                     | 5,161,277                          | 4,947,631                             | 423,310                                 | 209,664                                    | 88.21                   |

The original sequence data for the Covance and Health Canada samples differed significantly in terms of coverage, with the Covance samples having a median depth of 28-32x and the Health Canada samples having a median depth of 54-81x. To investigate the effect that read depth had on the variants called in the animals from these two colonies, the Health Canada data was downsampled to be comparable to the Covance data using the Picard DownsampleSam tool. The resulting downsampled data had a median depth of 28x, 28x, 28x, 27x and 29x, respectively. The same analysis described in the Variant Calling section of the Methods was then repeated on the downsampled data. As shown here, the number of variants called in the original data and downsampled data are comparable and, in every case, the downsampled data had a nearly 90% overlap with the variants called from the original data.

**Supplemental Table S5.** Number of variants detected with two different library preparations

| <b>Health Canada Mutamouse Animal</b> | <b># Variants from Nextera Mate-Pair Library</b> | <b># Variants from Illumina TruSeq Paired-End Library</b> | <b>Unique Variants from Nextera Mate-Pair Library</b> | <b>Unique Variants from Illumina TruSeq Paired-End Library</b> | <b>Intersection (%)</b> |
|---------------------------------------|--------------------------------------------------|-----------------------------------------------------------|-------------------------------------------------------|----------------------------------------------------------------|-------------------------|
| 2                                     | 4,765,274                                        | 4,887,954                                                 | 227,071                                               | 349,751                                                        | 88.78                   |

The original sequence data for Health Canada Mutamouse Animal 2 was generated from two different library preparations, namely Illumina TruSeq and Nextera Mate Pair libraries. This latter library preparation was used for the two Covance mice. To investigate the effect that the library preparation had on the variants called in this animal, the original BAM file was split based on read group to produce a BAM file for each library preparation method. The same analysis described in the Variant Calling section of the Methods was then repeated on the two newly produced BAM files. As shown here, the number of variants called from either library preparation is comparable and this split data had nearly 90% overlap in terms of the variants called.
